# Supplementary material for: Meningioma animal models: a systematic review and meta-analysis
Source: PubMed Central journal article supplement (PMC10612271; doi:10.1186/s12967-023-04620-7), 2023-10-28

ECLM-Hetero-Tumor take rate

| Study                | Events | Total | Proportion | 95%-CI       | Weight |
|----------------------|--------|-------|------------|--------------|--------|
| Senol 2015a          | 30     | 30    | 1.00       | [0.88; 1.00] | 1.8%   |
| Senol 2015b          | 16     | 16    | 1.00       | [0.79; 1.00] | 1.7%   |
| Soto-Montenegro 2014 | 16     | 16    | 1.00       | [0.79; 1.00] | 1.7%   |
| Gal-Gonzalez 2018    | 6      | 6     | 1.00       | [0.54; 1.00] | 1.7%   |
| Ragel 2008a          | 10     | 10    | 1.00       | [0.69; 1.00] | 1.7%   |
| Ragel 2006           | 15     | 15    | 1.00       | [0.78; 1.00] | 1.7%   |
| Choudhury 2022       | 20     | 20    | 1.00       | [0.83; 1.00] | 1.8%   |
| Yazaki 1995          | 40     | 40    | 1.00       | [0.91; 1.00] | 1.8%   |
| Ding 2022a           | 48     | 48    | 1.00       | [0.93; 1.00] | 1.8%   |
| Ding 2022b           | 48     | 48    | 1.00       | [0.93; 1.00] | 1.8%   |
| Takeda 2017a         | 6      | 6     | 1.00       | [0.54; 1.00] | 1.7%   |
| Takeda 2017b         | 9      | 9     | 1.00       | [0.66; 1.00] | 1.7%   |
| Kanno 2013           | 10     | 10    | 1.00       | [0.69; 1.00] | 1.7%   |
| Ishiwata 2004        | 3      | 3     | 1.00       | [0.29; 1.00] | 1.6%   |
| Kim 2020a            | 8      | 8     | 1.00       | [0.63; 1.00] | 1.7%   |
| Kim 2020b            | 6      | 6     | 1.00       | [0.54; 1.00] | 1.7%   |
| Guo 2021             | 28     | 28    | 1.00       | [0.88; 1.00] | 1.8%   |
| Wang 2018            | 9      | 9     | 1.00       | [0.66; 1.00] | 1.7%   |
| Zhang 2020           | 64     | 64    | 1.00       | [0.94; 1.00] | 1.8%   |
| Wang 2016            | 23     | 30    | 0.77       | [0.58; 0.90] | 19.3%  |
| Park 2015            | 8      | 8     | 1.00       | [0.63; 1.00] | 1.7%   |
| Iwami 2015a          | 10     | 10    | 1.00       | [0.69; 1.00] | 1.7%   |
| Iwami 2015b          | 10     | 10    | 1.00       | [0.69; 1.00] | 1.7%   |
| Wilisch-Neumann 2013 | 15     | 15    | 1.00       | [0.78; 1.00] | 1.7%   |
| Pachow 2013          | 15     | 15    | 1.00       | [0.78; 1.00] | 1.7%   |
| Kliese 2013          | 14     | 14    | 1.00       | [0.77; 1.00] | 1.7%   |
| Haase 2010           | 13     | 15    | 0.87       | [0.60; 0.98] | 6.2%   |
| Ge 2016              | 8      | 8     | 1.00       | [0.63; 1.00] | 1.7%   |
| Kargiotis 2008       | 40     | 40    | 1.00       | [0.91; 1.00] | 1.8%   |
| Ragel 2008           | 19     | 20    | 0.95       | [0.75; 1.00] | 3.4%   |
| Gupta 2007           | 10     | 10    | 1.00       | [0.69; 1.00] | 1.7%   |
| Ragel 2006a          | 55     | 55    | 1.00       | [0.94; 1.00] | 1.8%   |
| Ragel 2006b          | 30     | 30    | 1.00       | [0.88; 1.00] | 1.8%   |
| Kondraganti 2006     | 30     | 30    | 1.00       | [0.88; 1.00] | 1.8%   |
| Surace 2004          | 16     | 16    | 1.00       | [0.79; 1.00] | 1.7%   |
| Lee 1990             | 10     | 10    | 1.00       | [0.69; 1.00] | 1.7%   |
| John 2021            | 15     | 15    | 1.00       | [0.78; 1.00] | 1.7%   |
| Deng 2022            | 10     | 10    | 1.00       | [0.69; 1.00] | 1.7%   |
| Chen 2021            | 16     | 16    | 1.00       | [0.79; 1.00] | 1.7%   |
| Bao 2021             | 35     | 35    | 1.00       | [0.90; 1.00] | 1.8%   |
| Tanaka 1989          | 3      | 3     | 1.00       | [0.29; 1.00] | 1.6%   |
| Jungwirth 2021       | 30     | 30    | 1.00       | [0.88; 1.00] | 1.8%   |
| Jungwirth 2019       | 6      | 6     | 1.00       | [0.54; 1.00] | 1.7%   |
| Saydam 2009          | 24     | 24    | 1.00       | [0.86; 1.00] | 1.8%   |

Random effects model

867

Heterogeneity:  $I^2 = 0\%$ ,  $\tau^2 = 0$ ,  $p = 0.84$

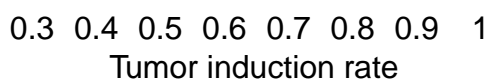

0.95 [0.93; 0.96] 100.0%

ECLM-Ortho-Tumor take rate

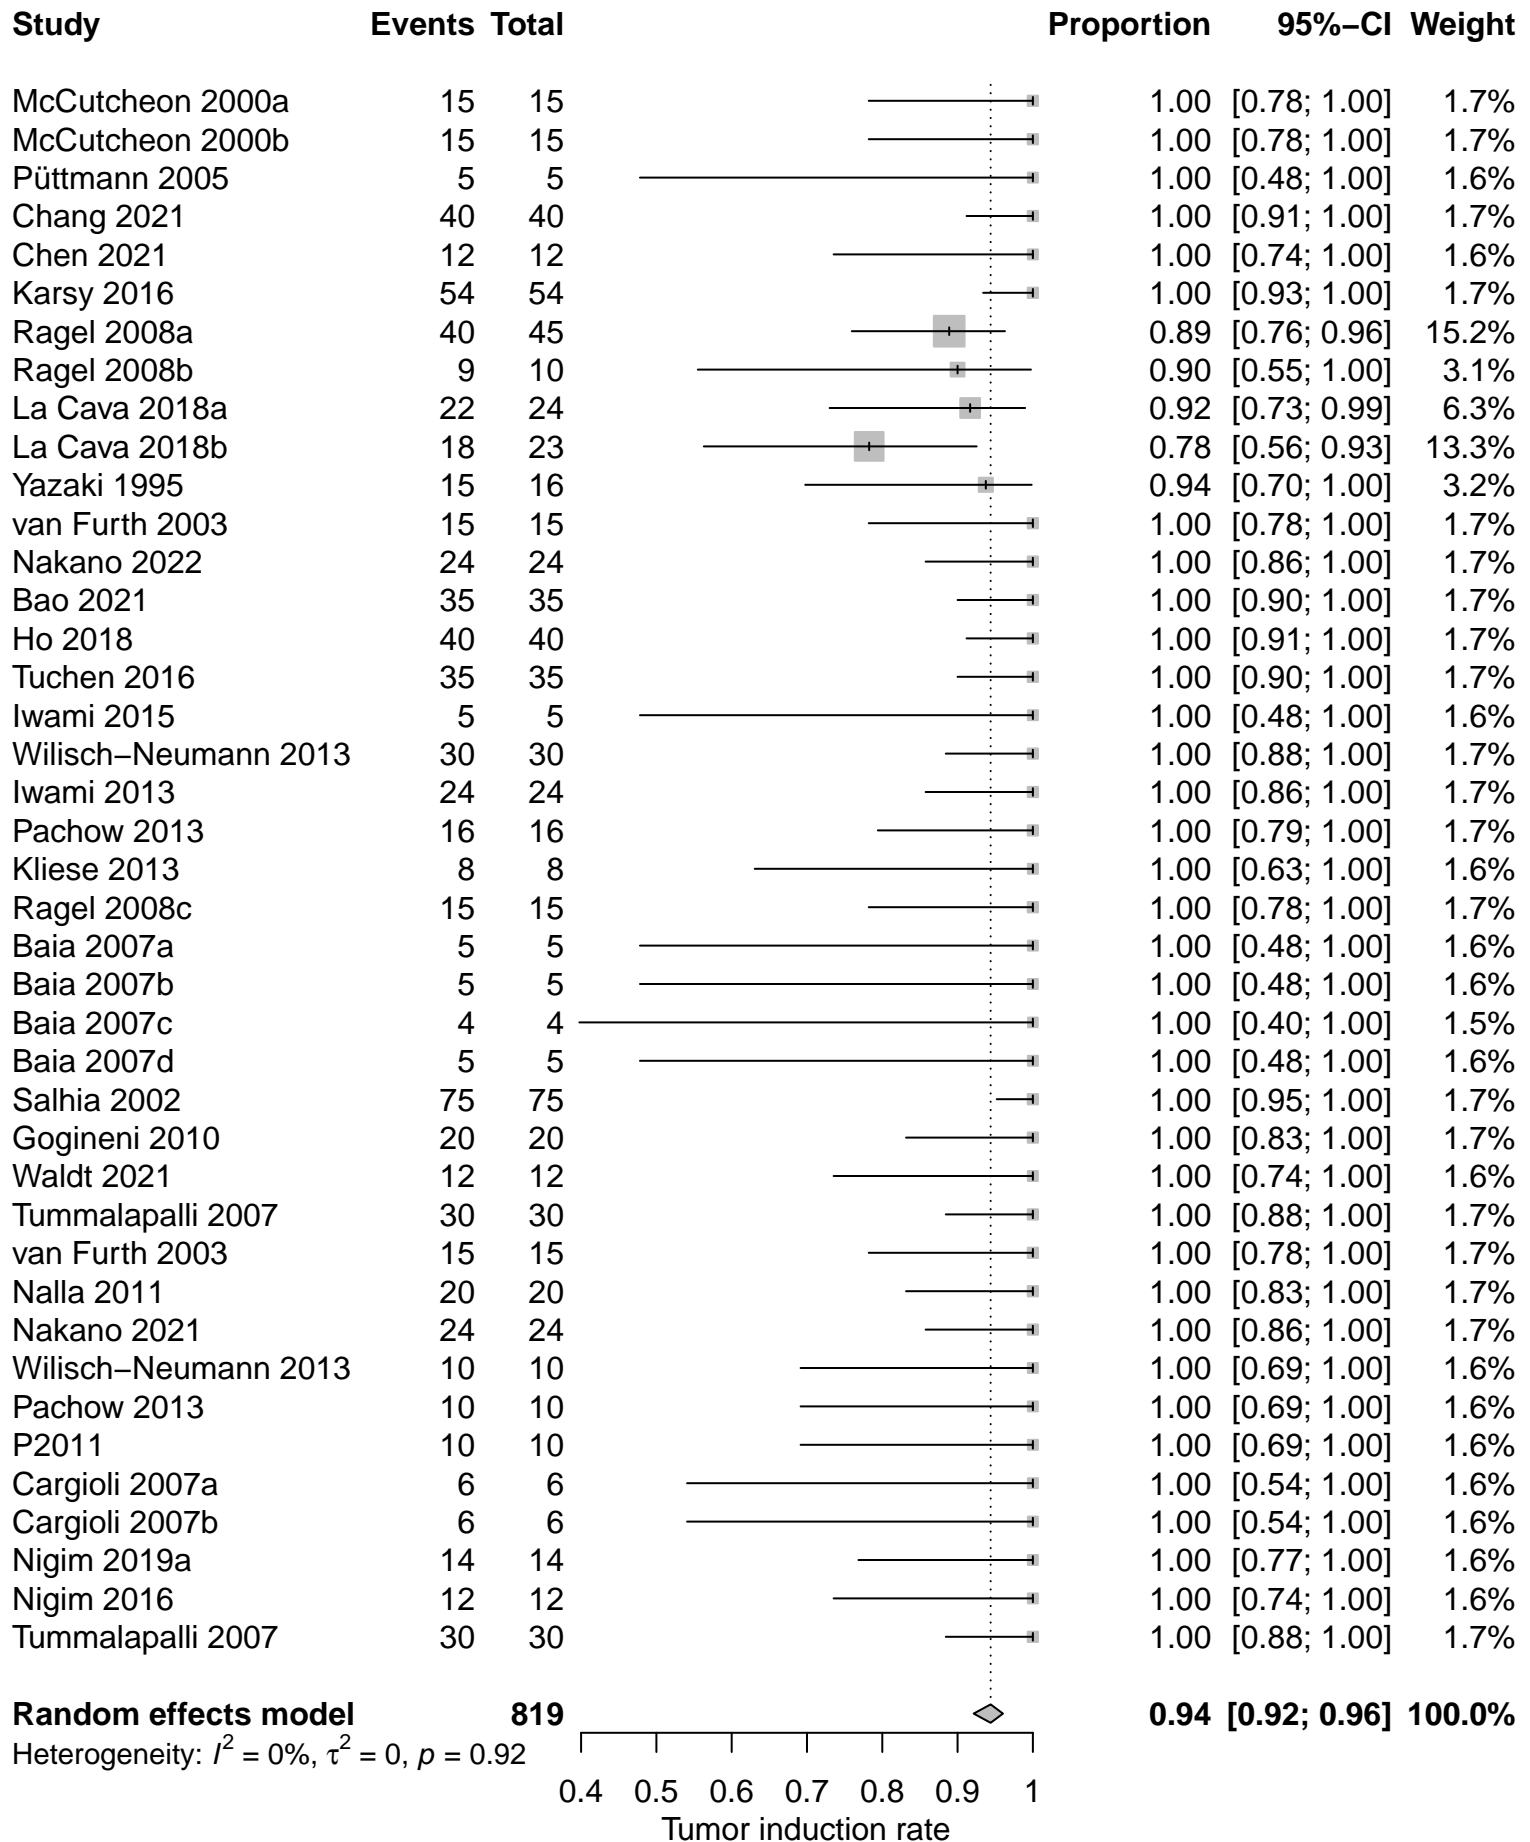

PTM-Hetero-Tumor take rate

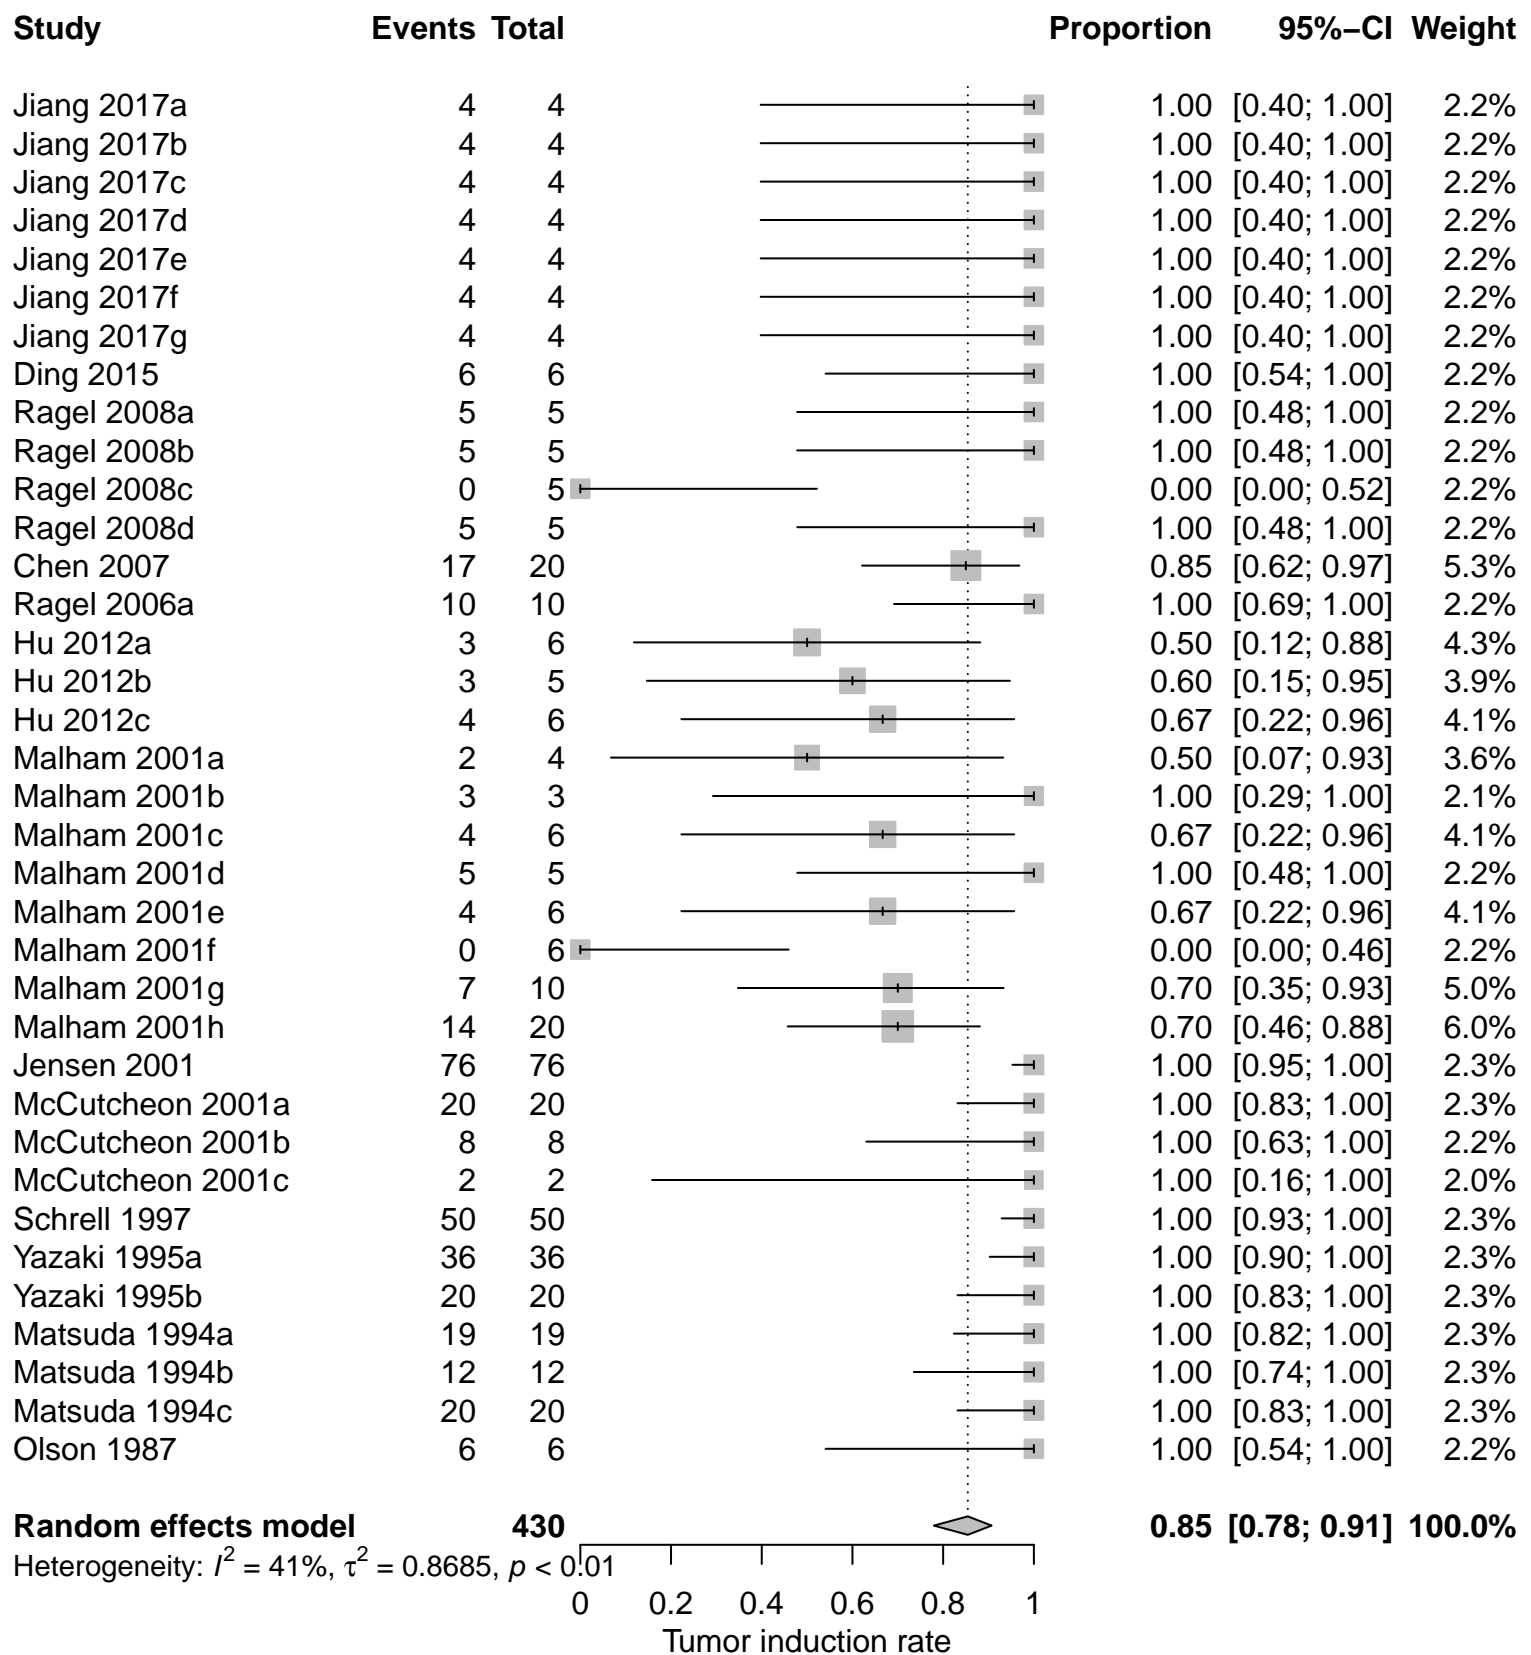

PTM-Ortho-Tumor take rate

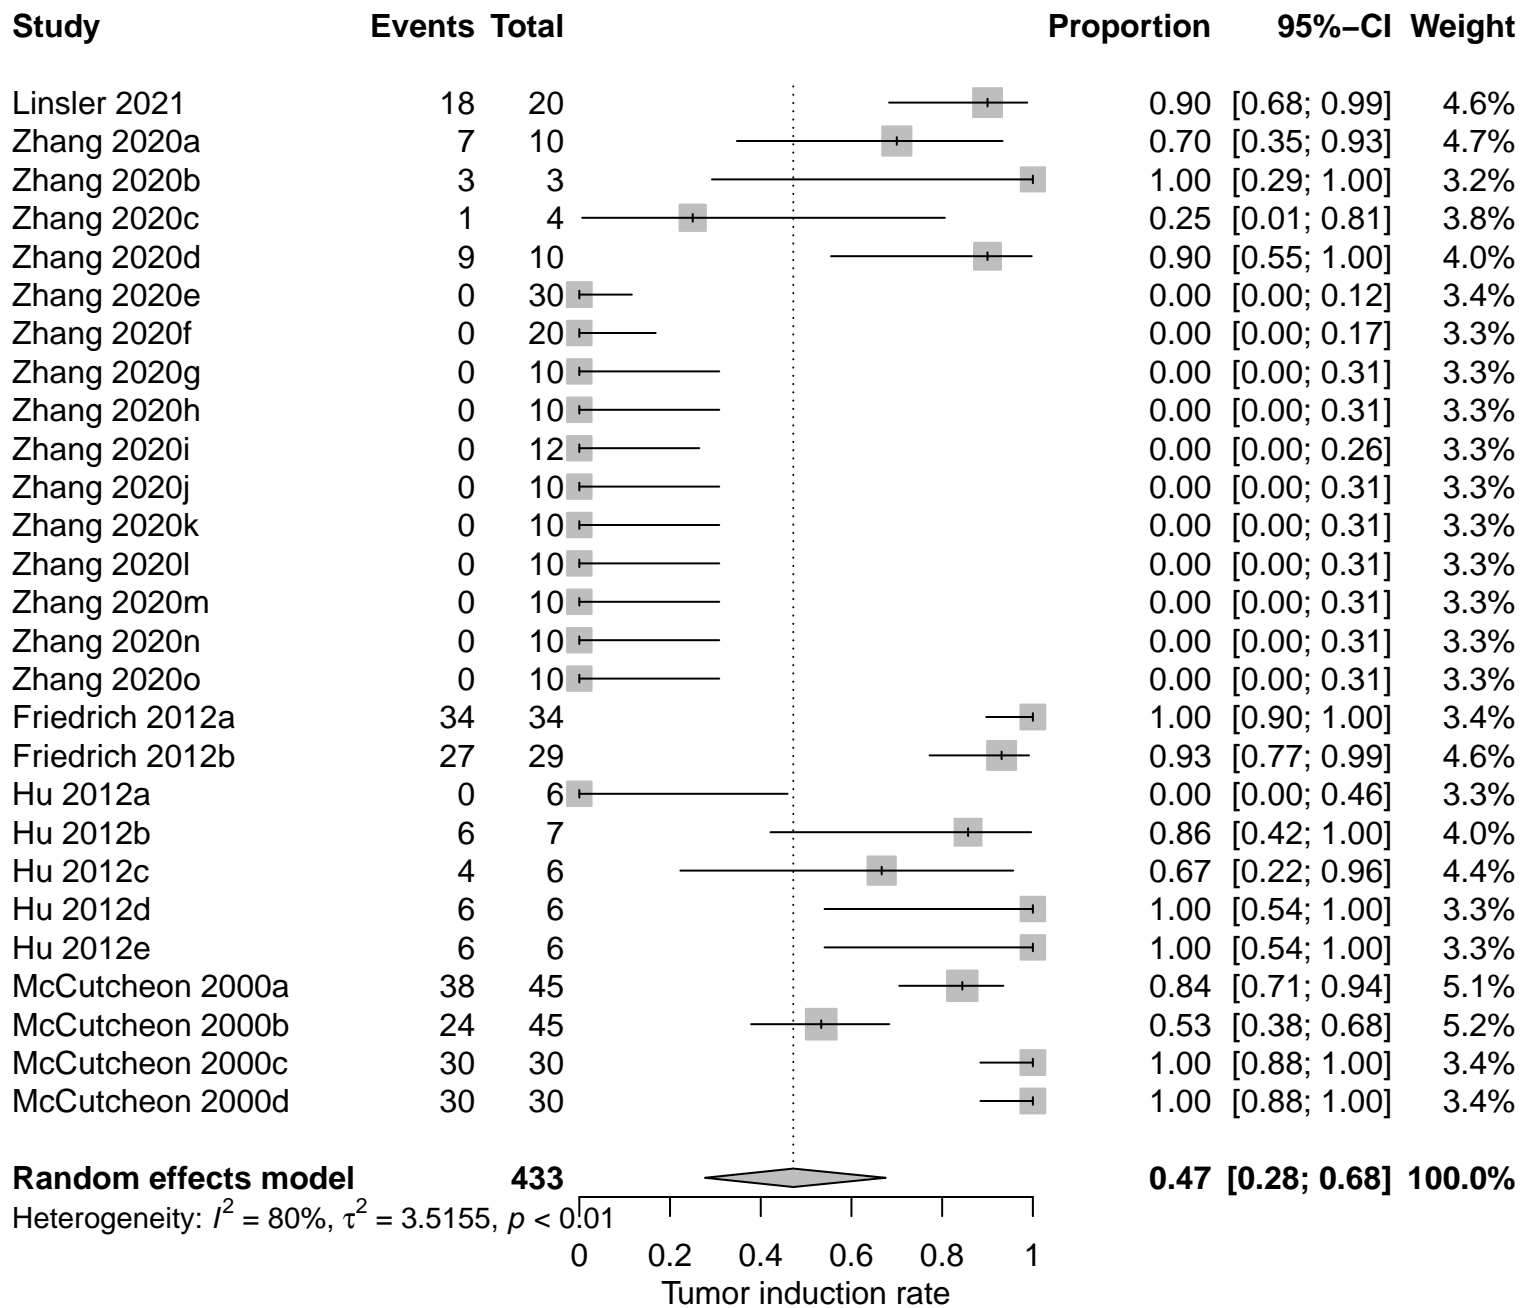

GEM-Tumor take rate

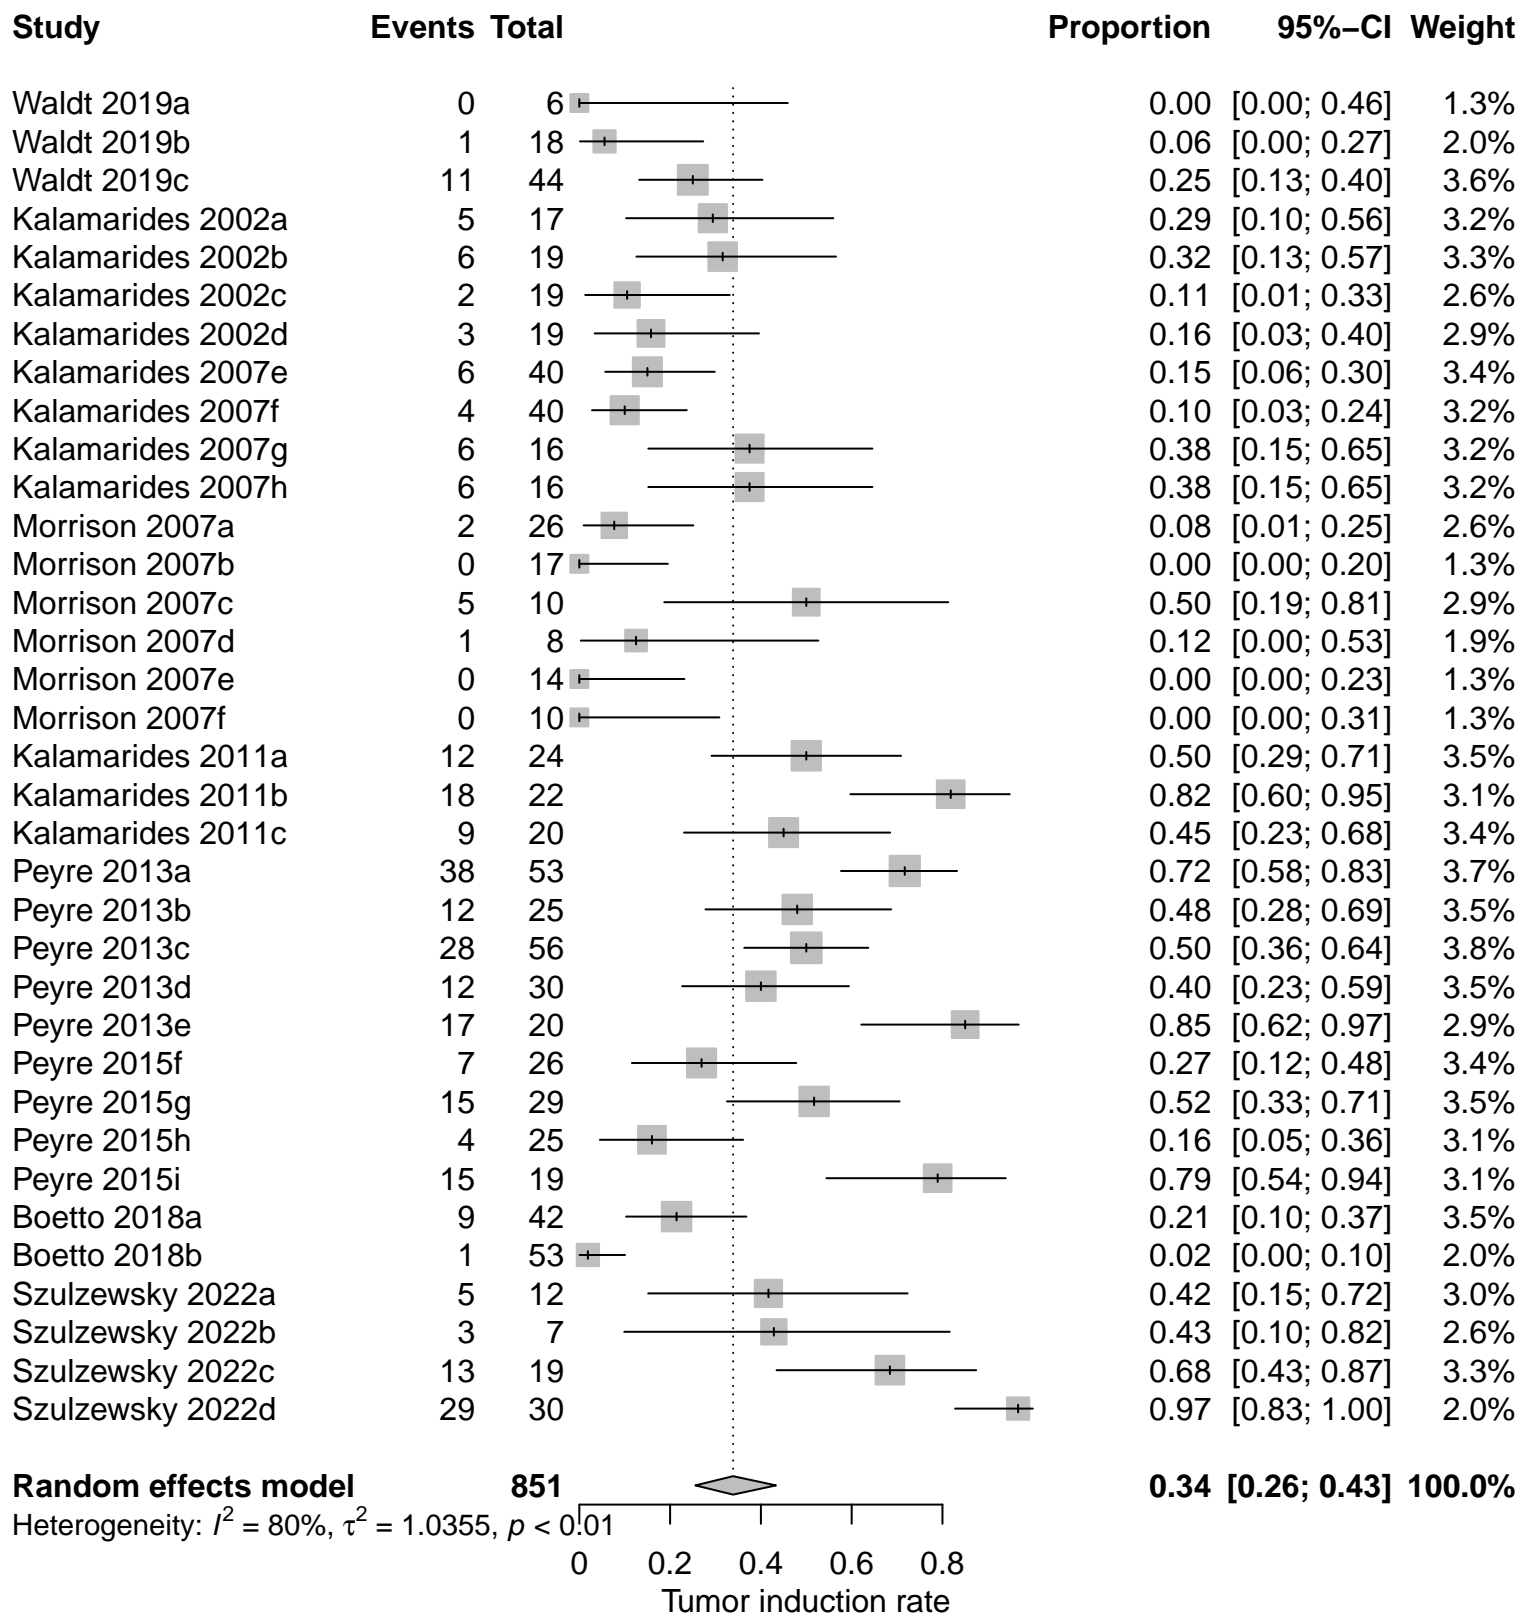

ECLM-Hetero-Duration of incubation

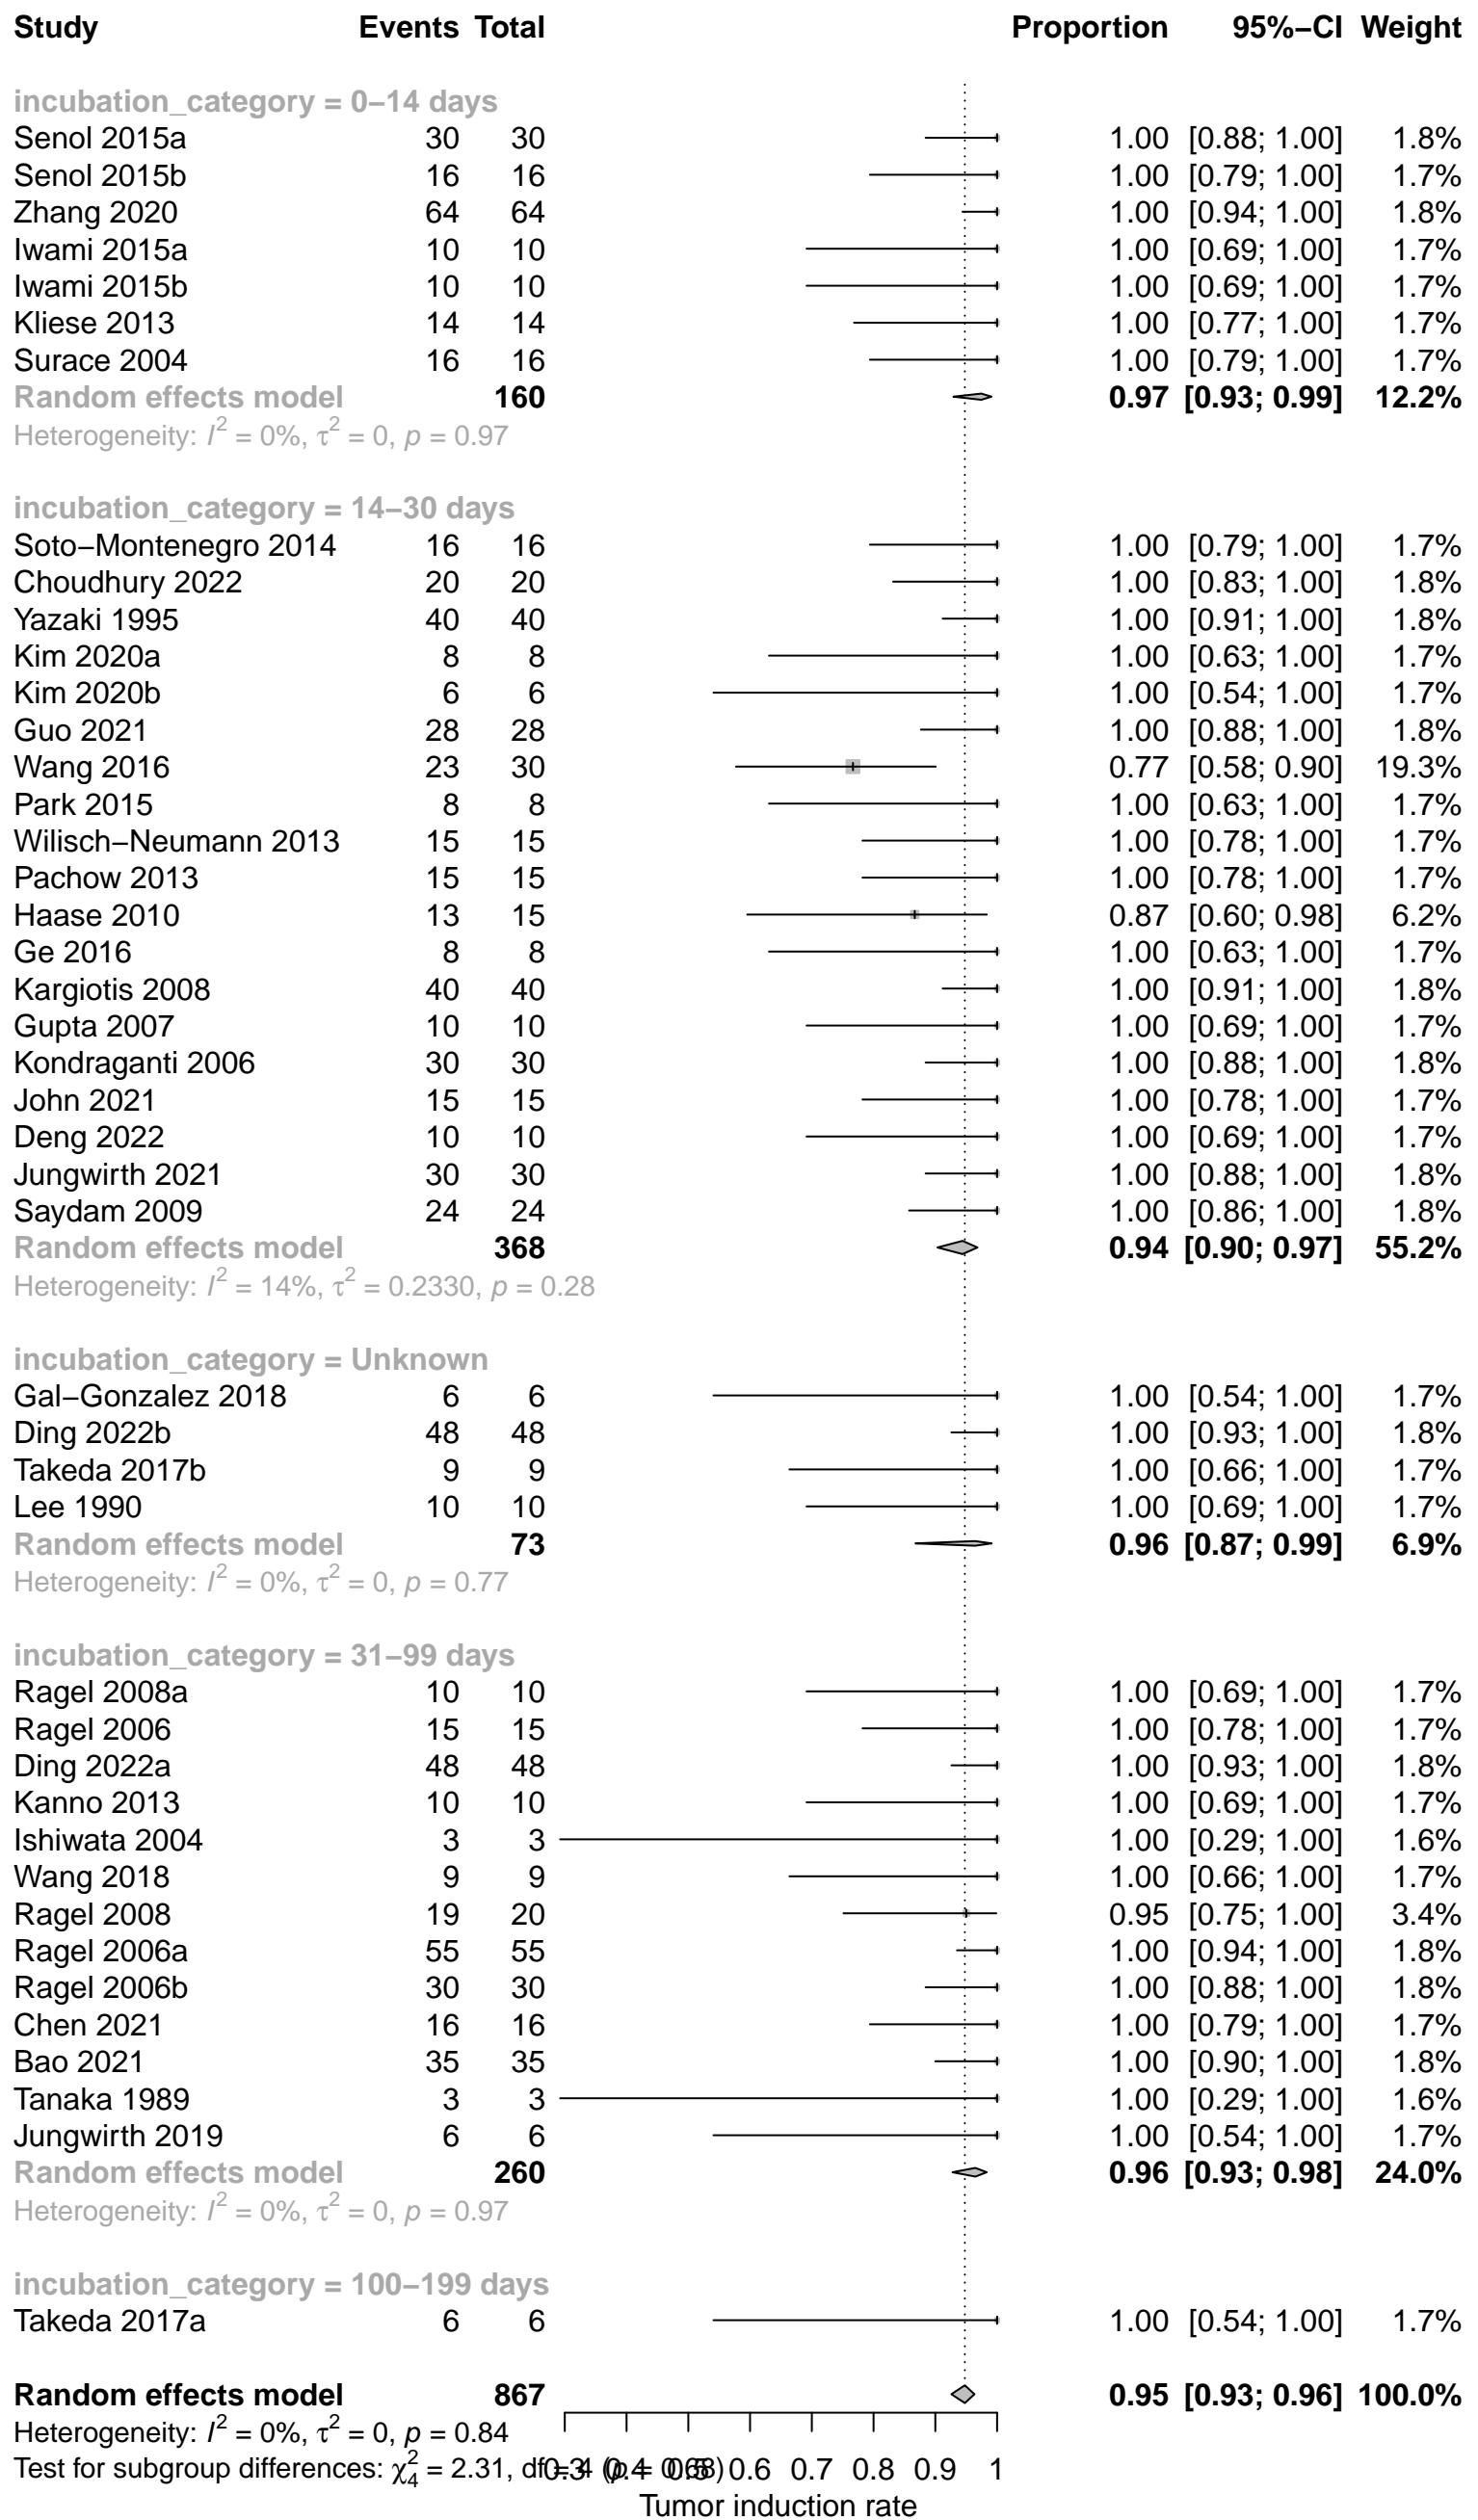

ECLM-Ortho-Duration of incubation

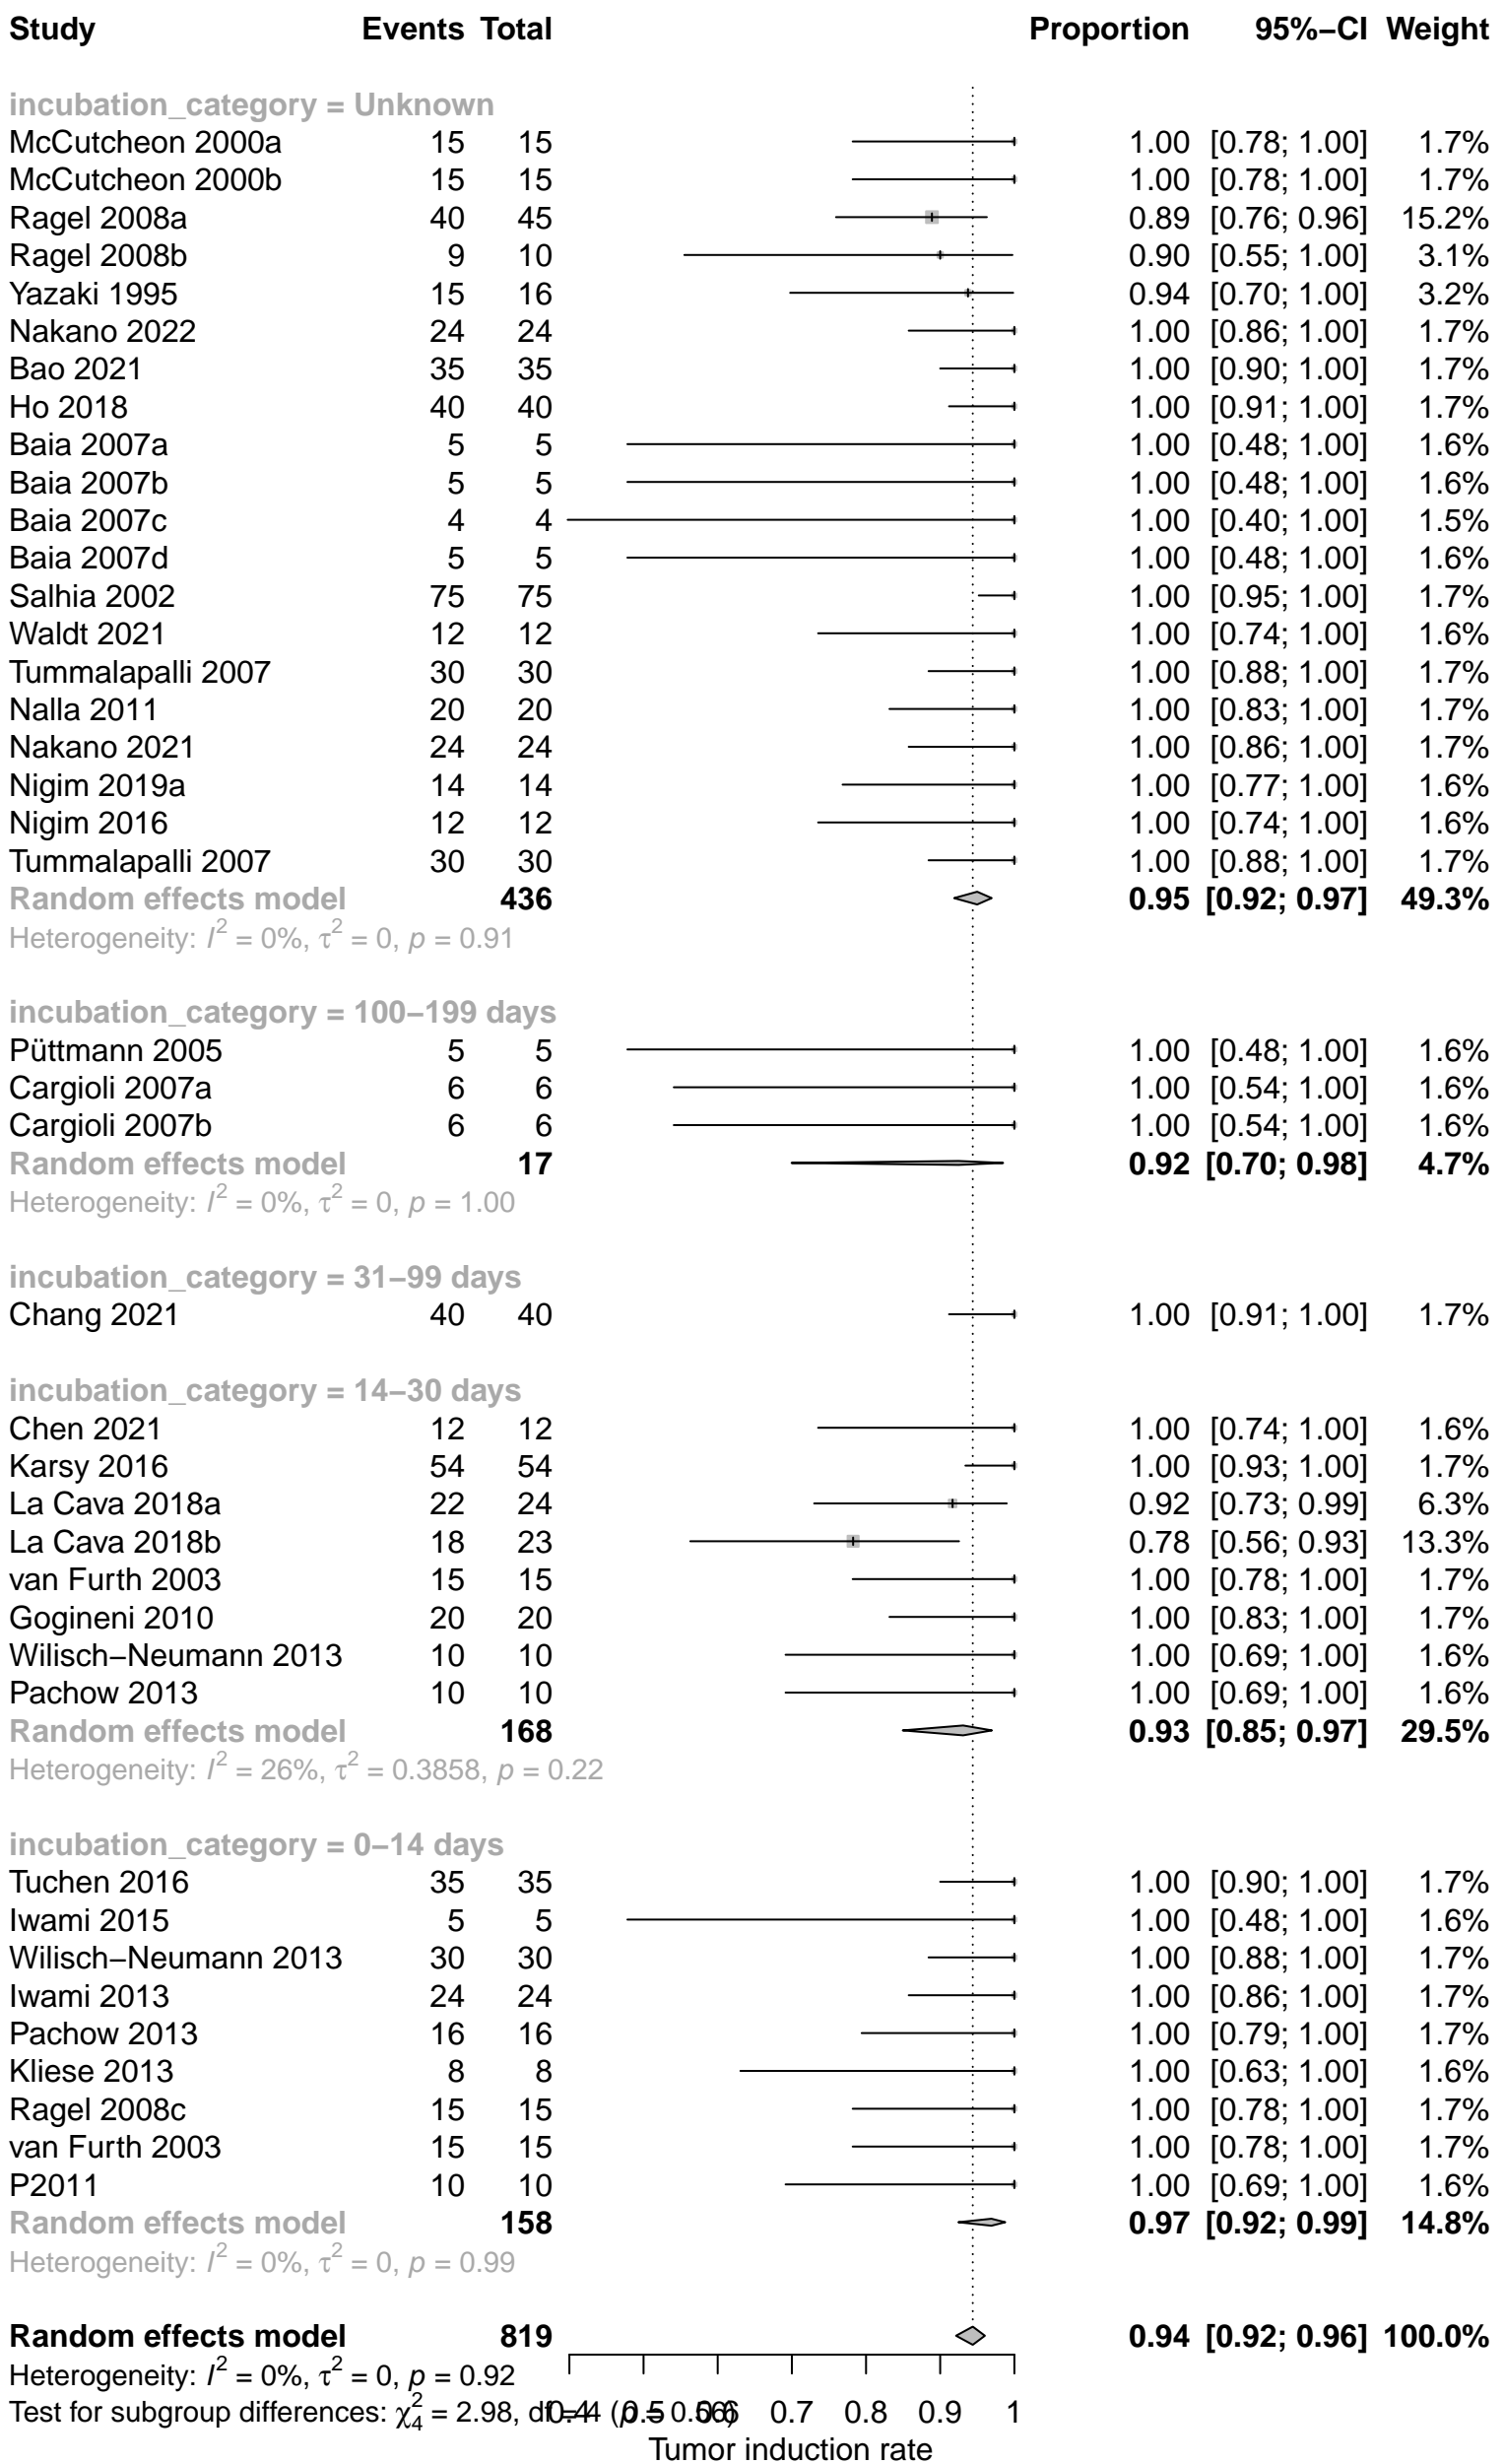

GEM-Duration of incubation

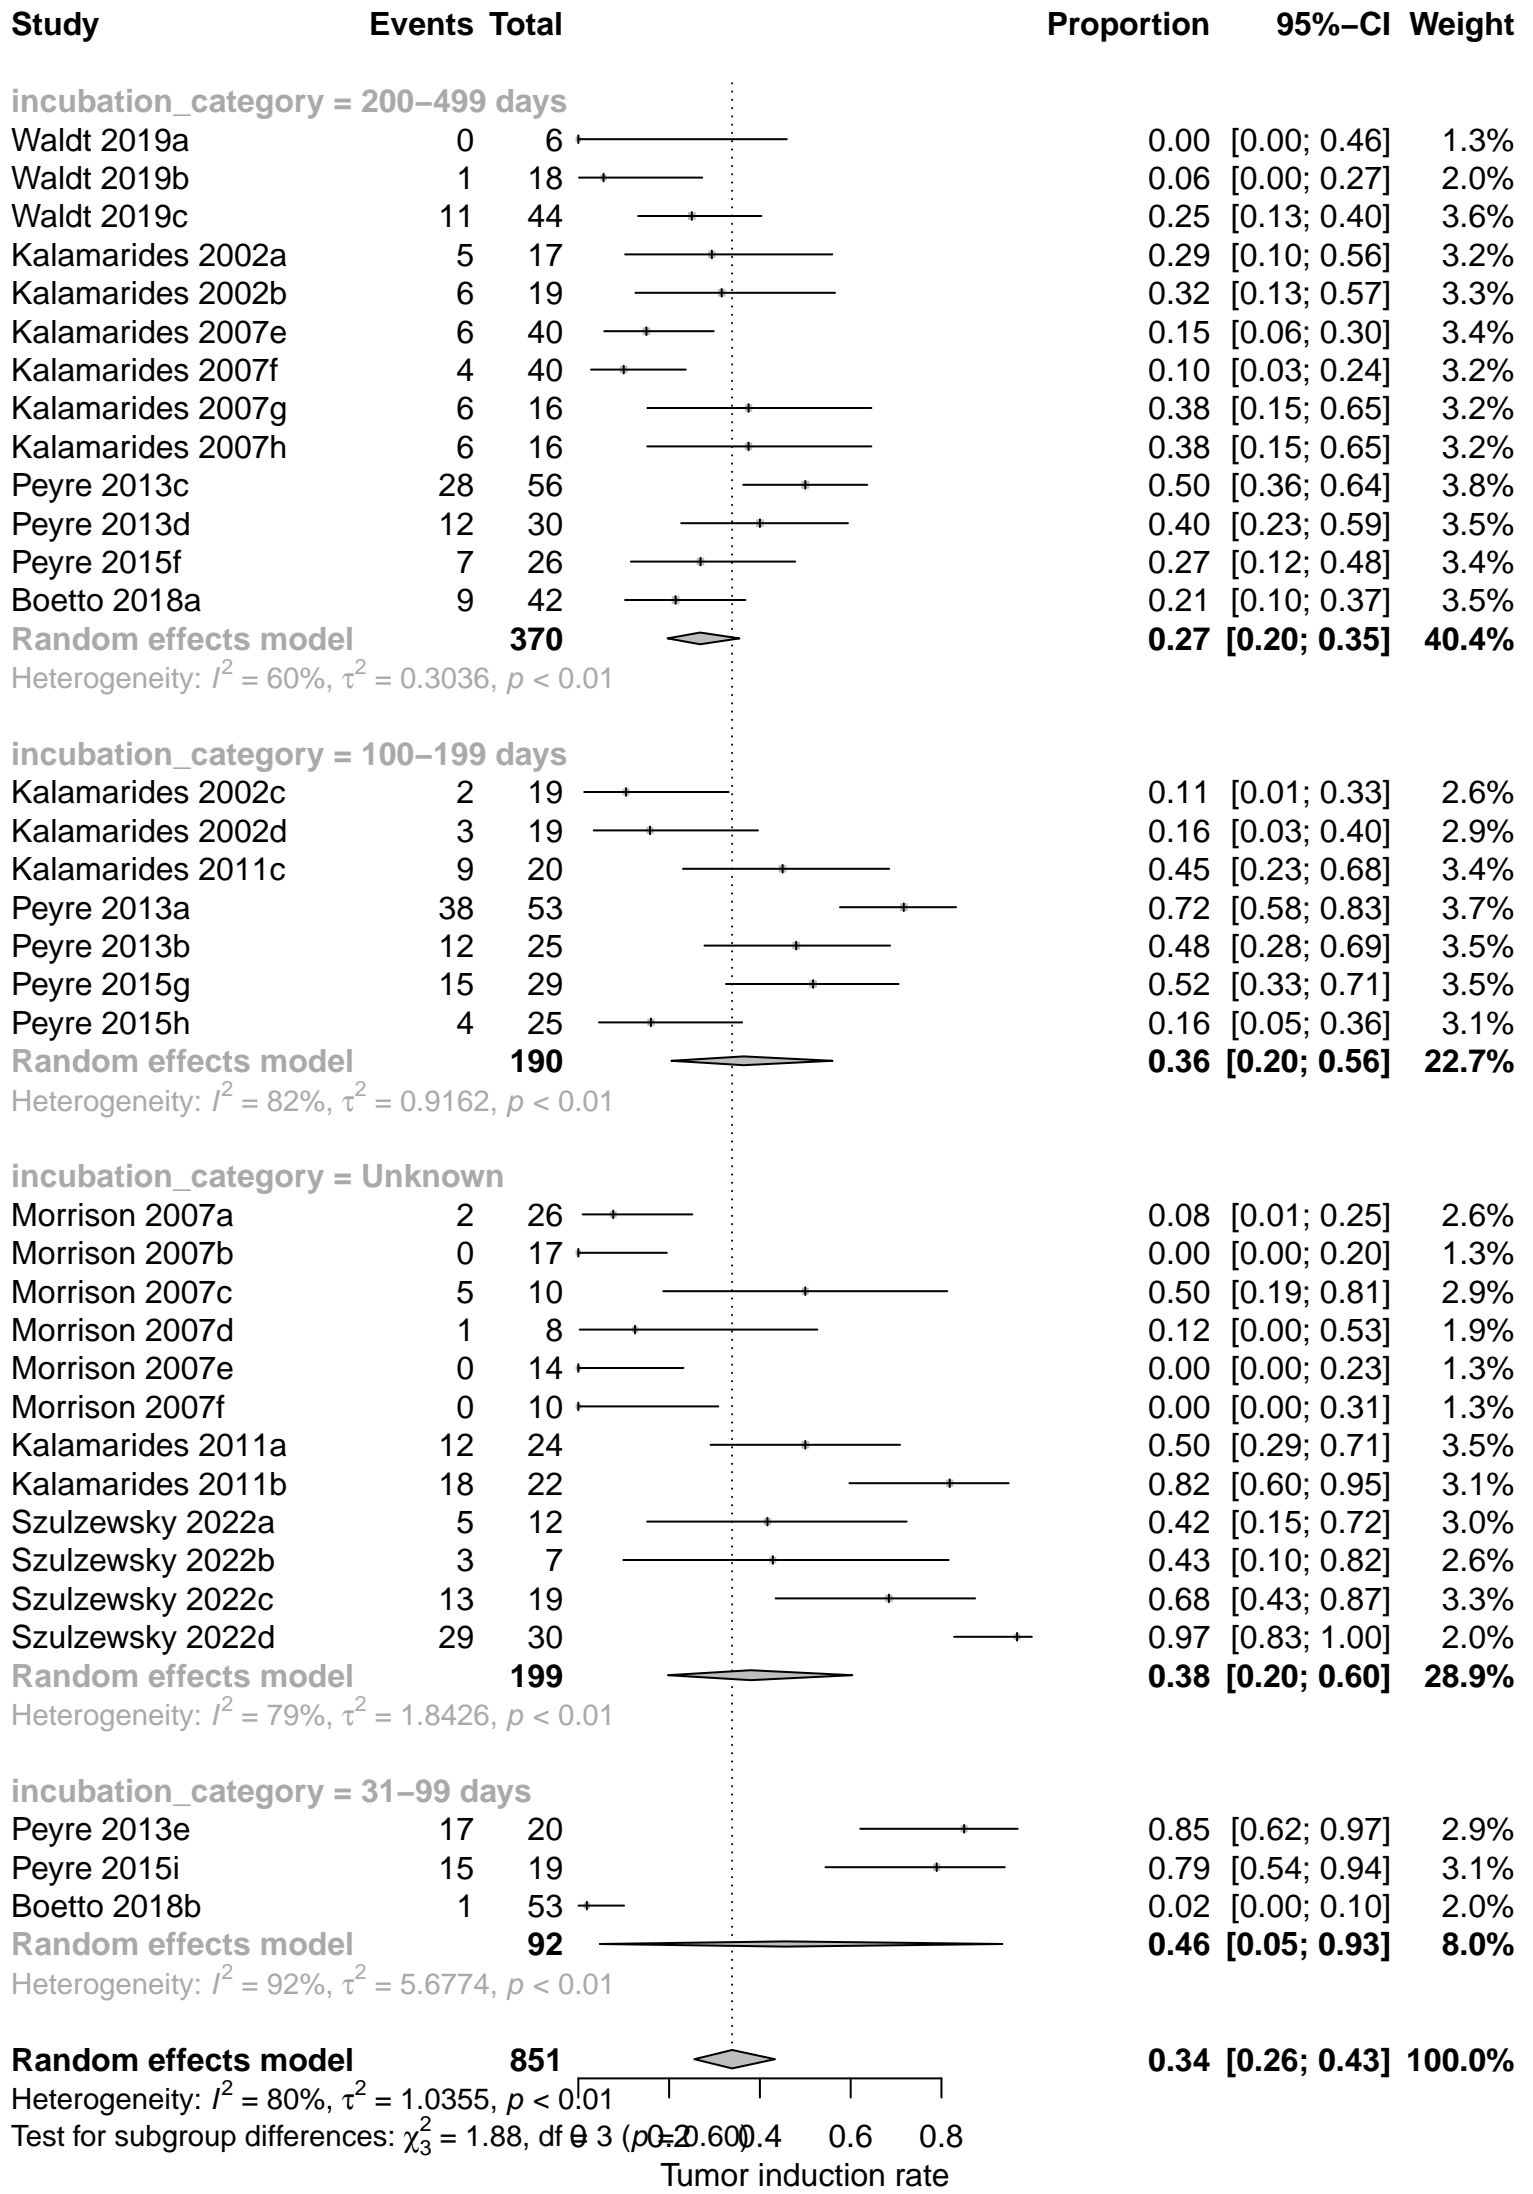



PTM-hetero-duration of incubation

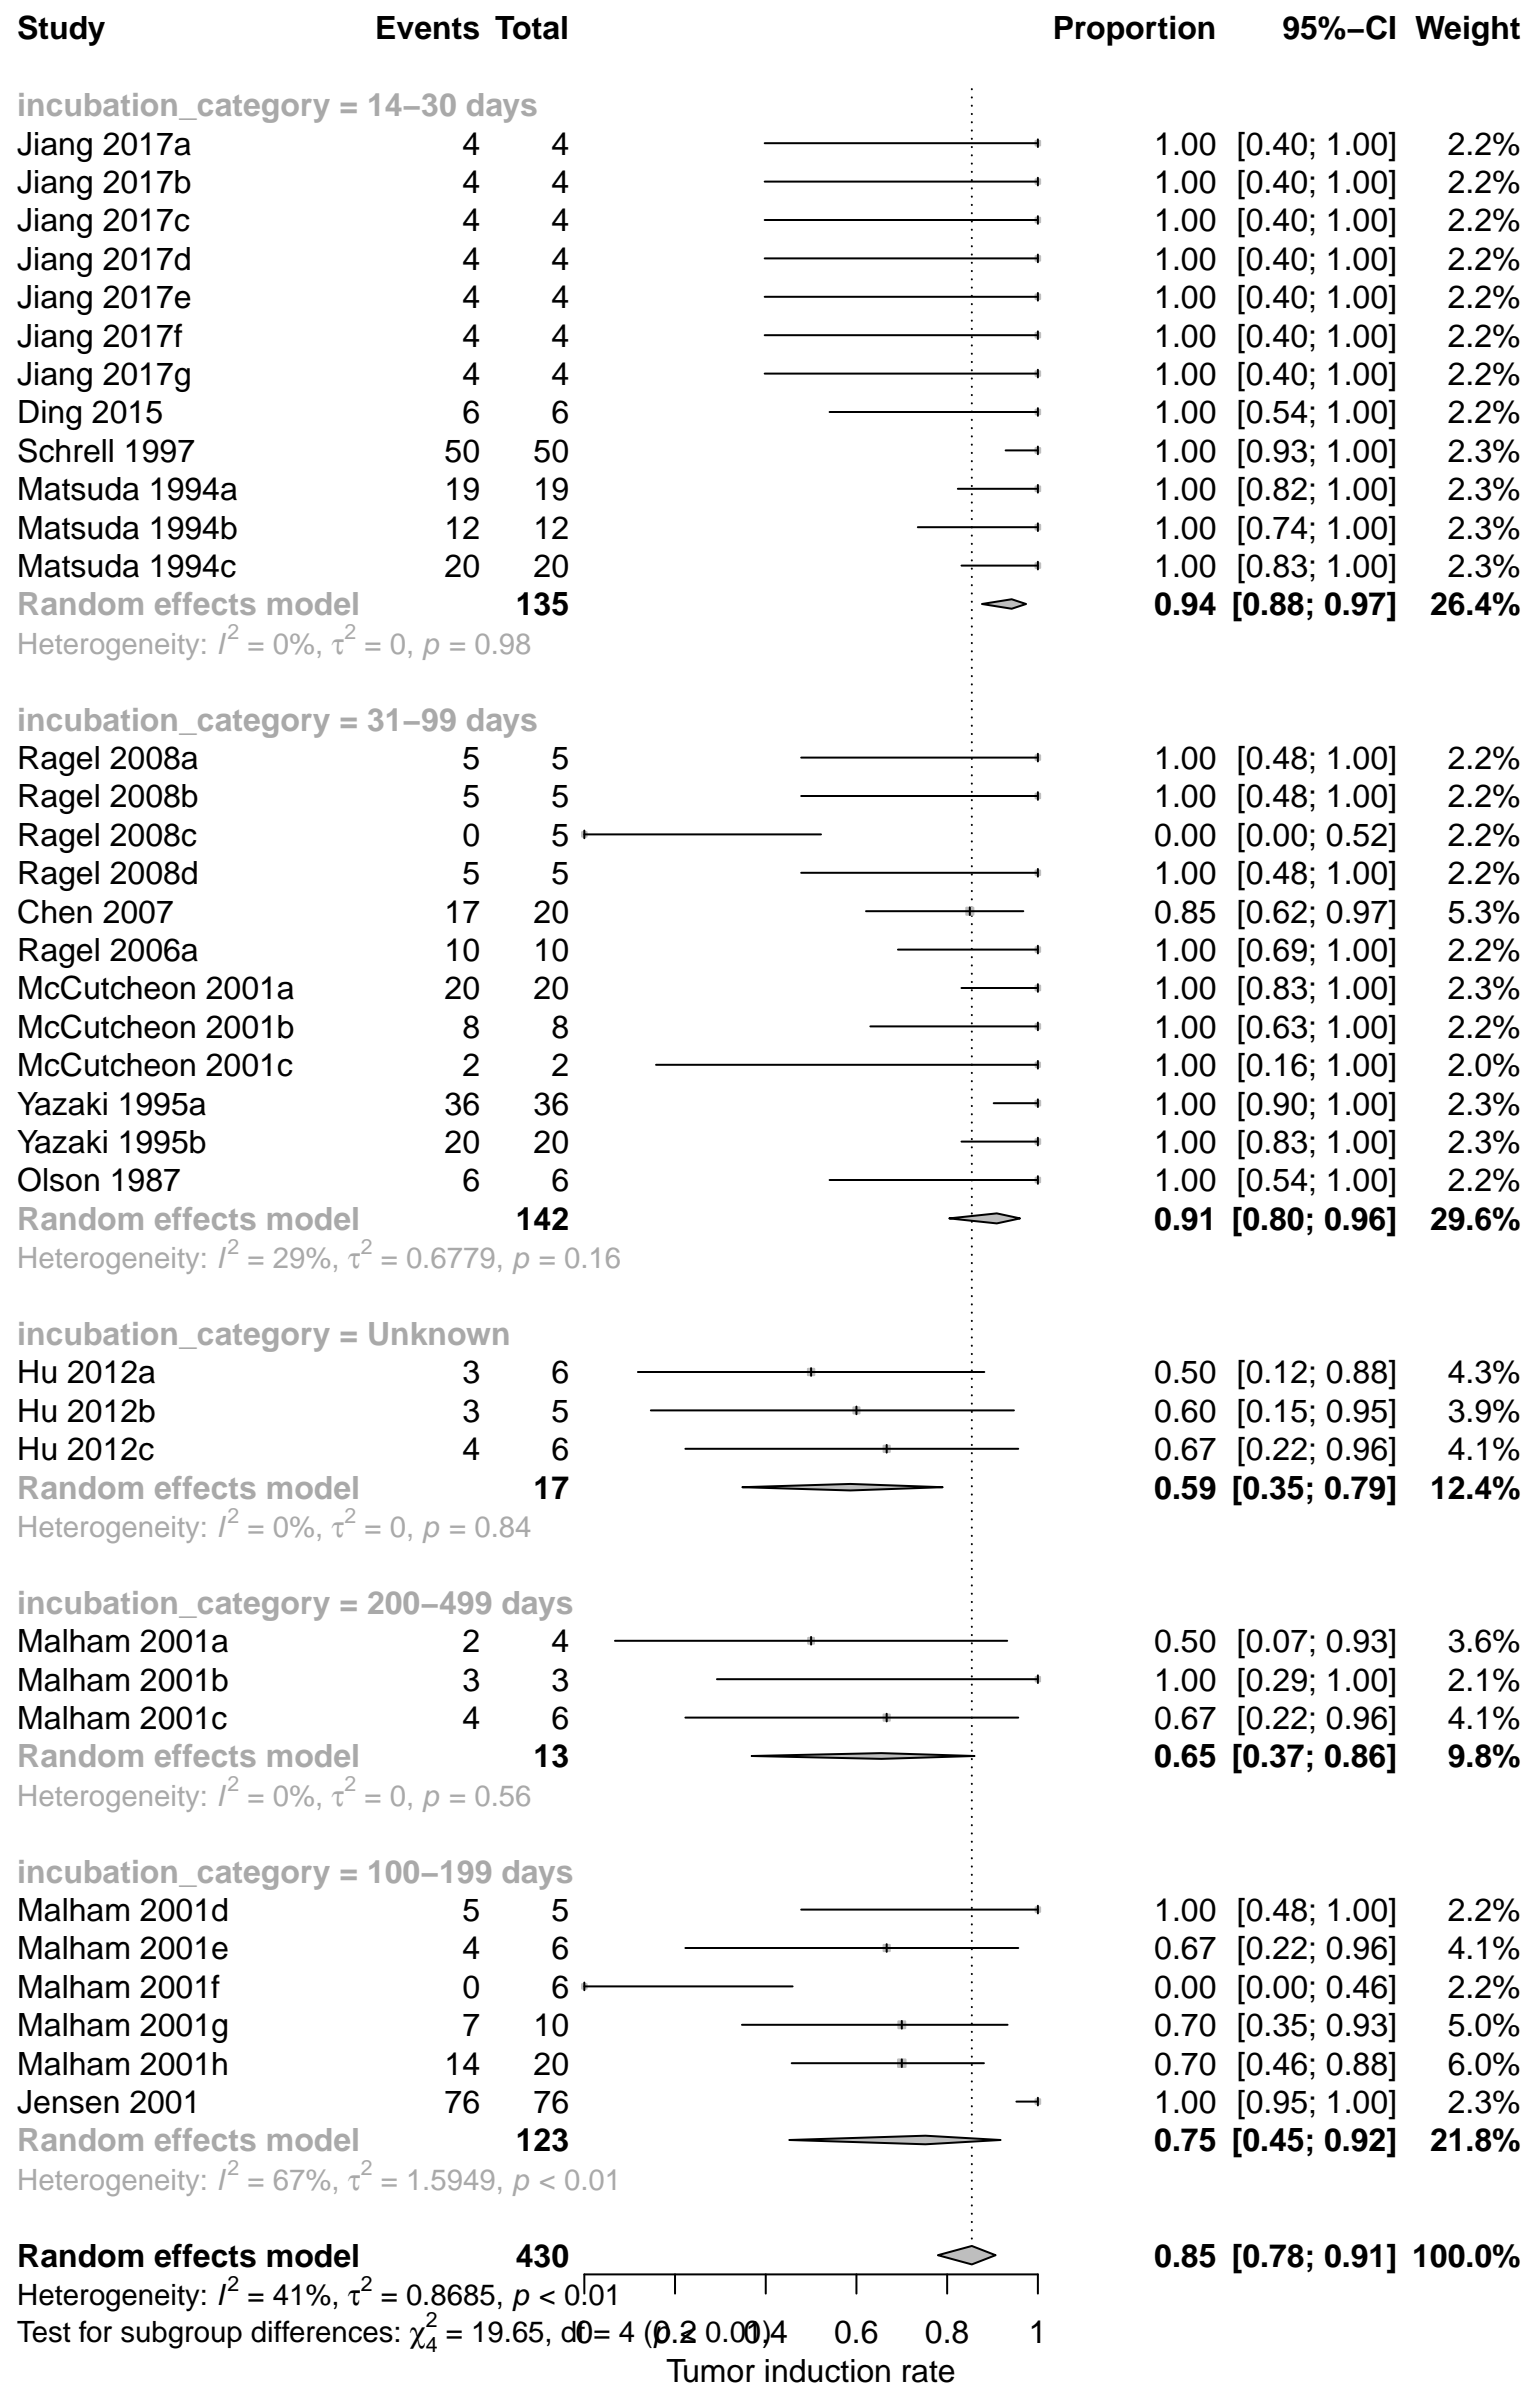

PTM-ortho-duration of incubation

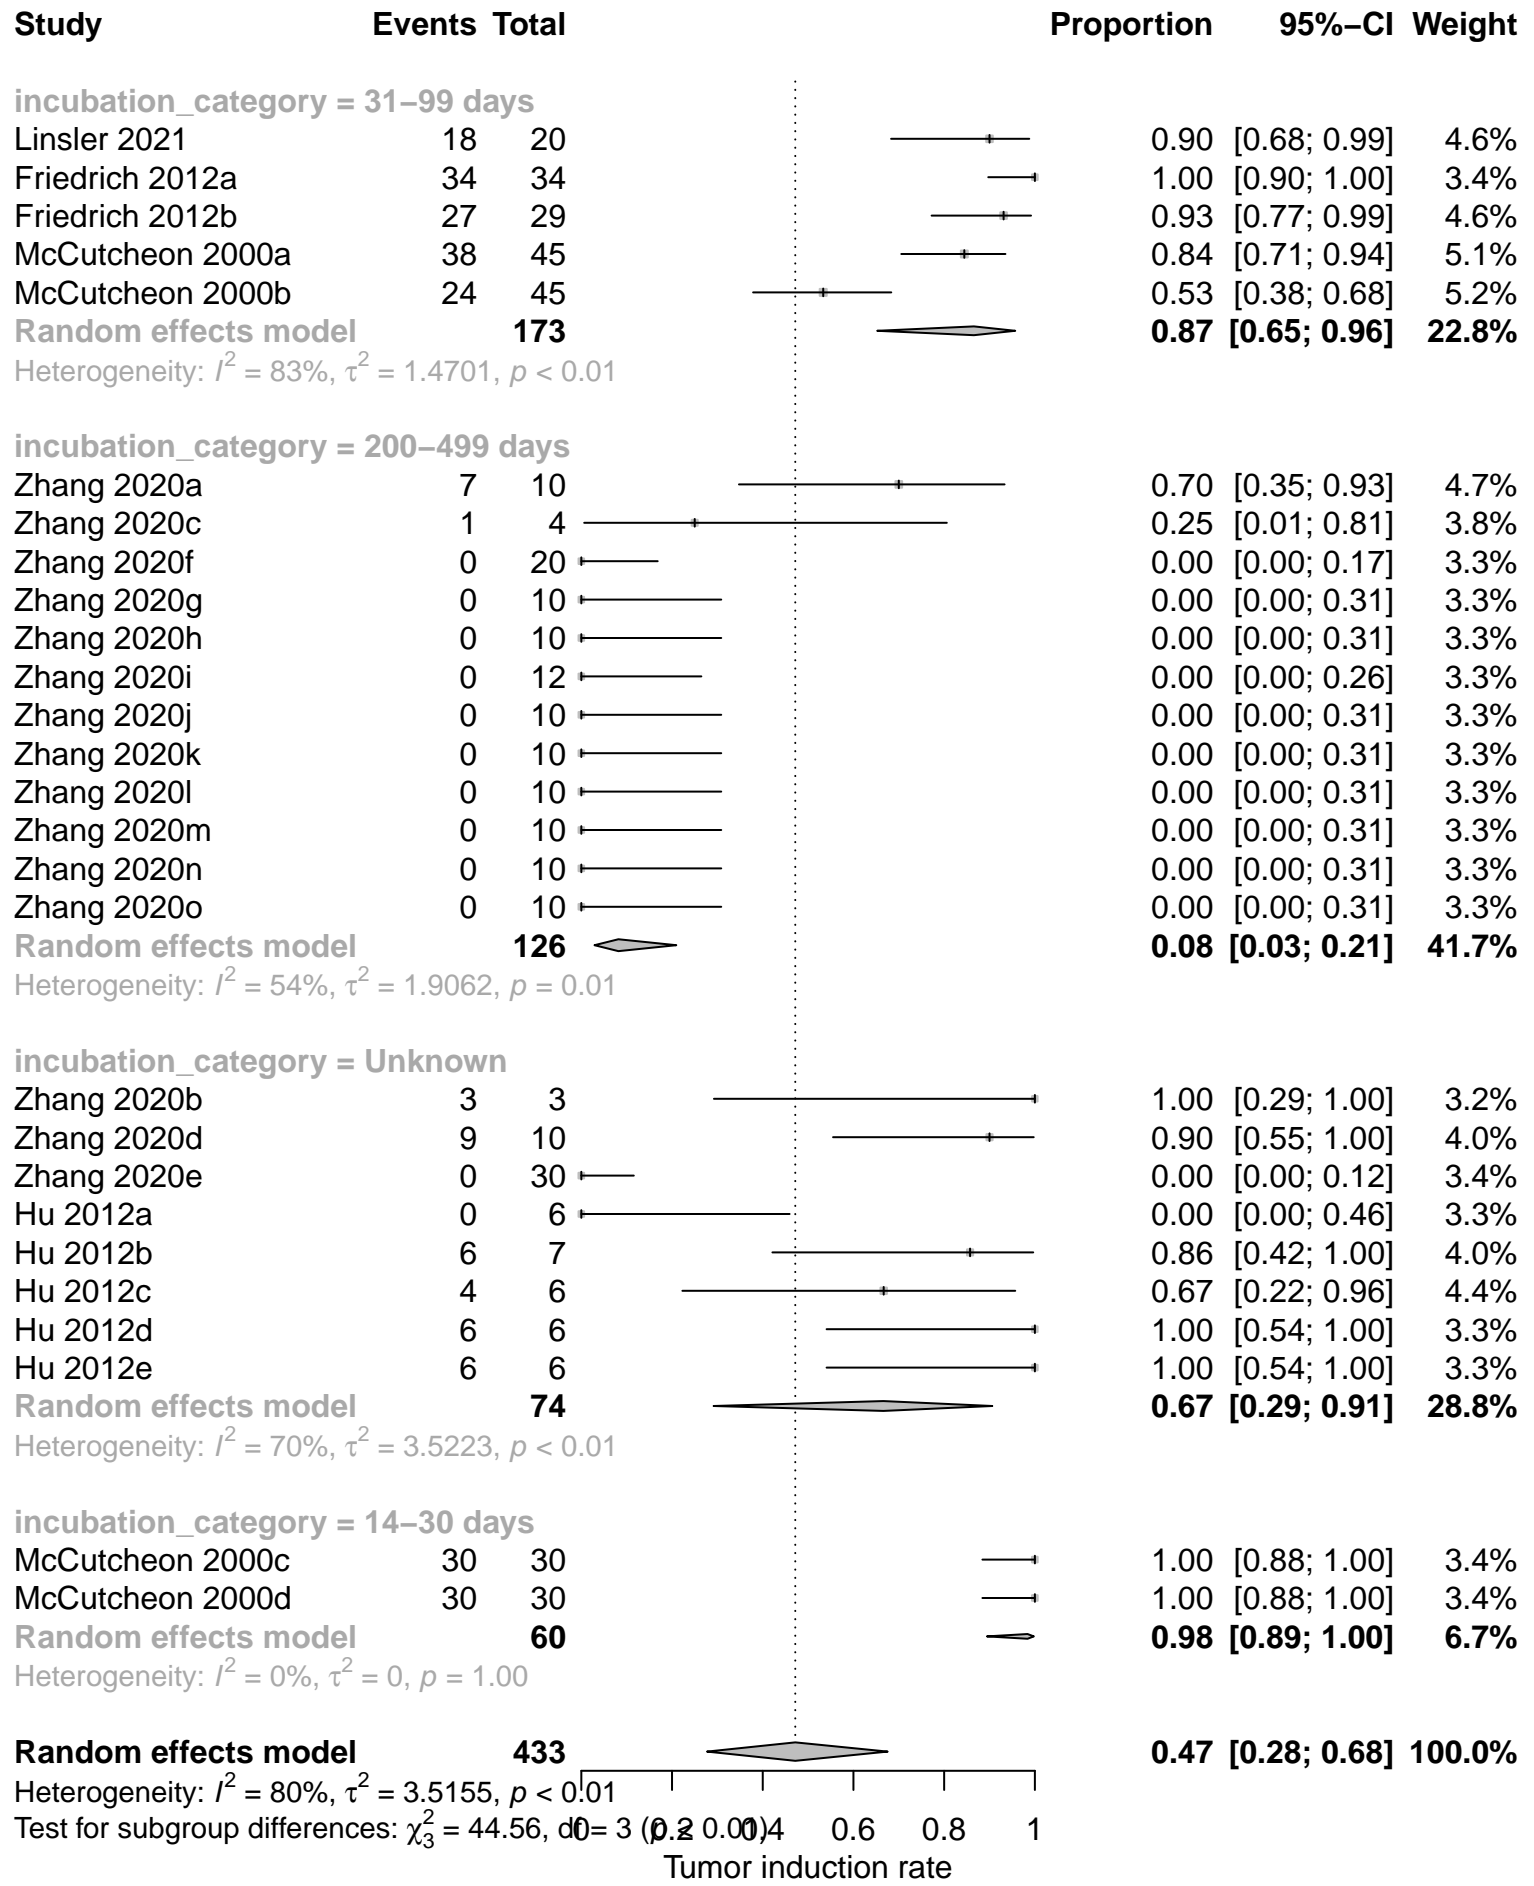

ECLM-hetero-number of cells

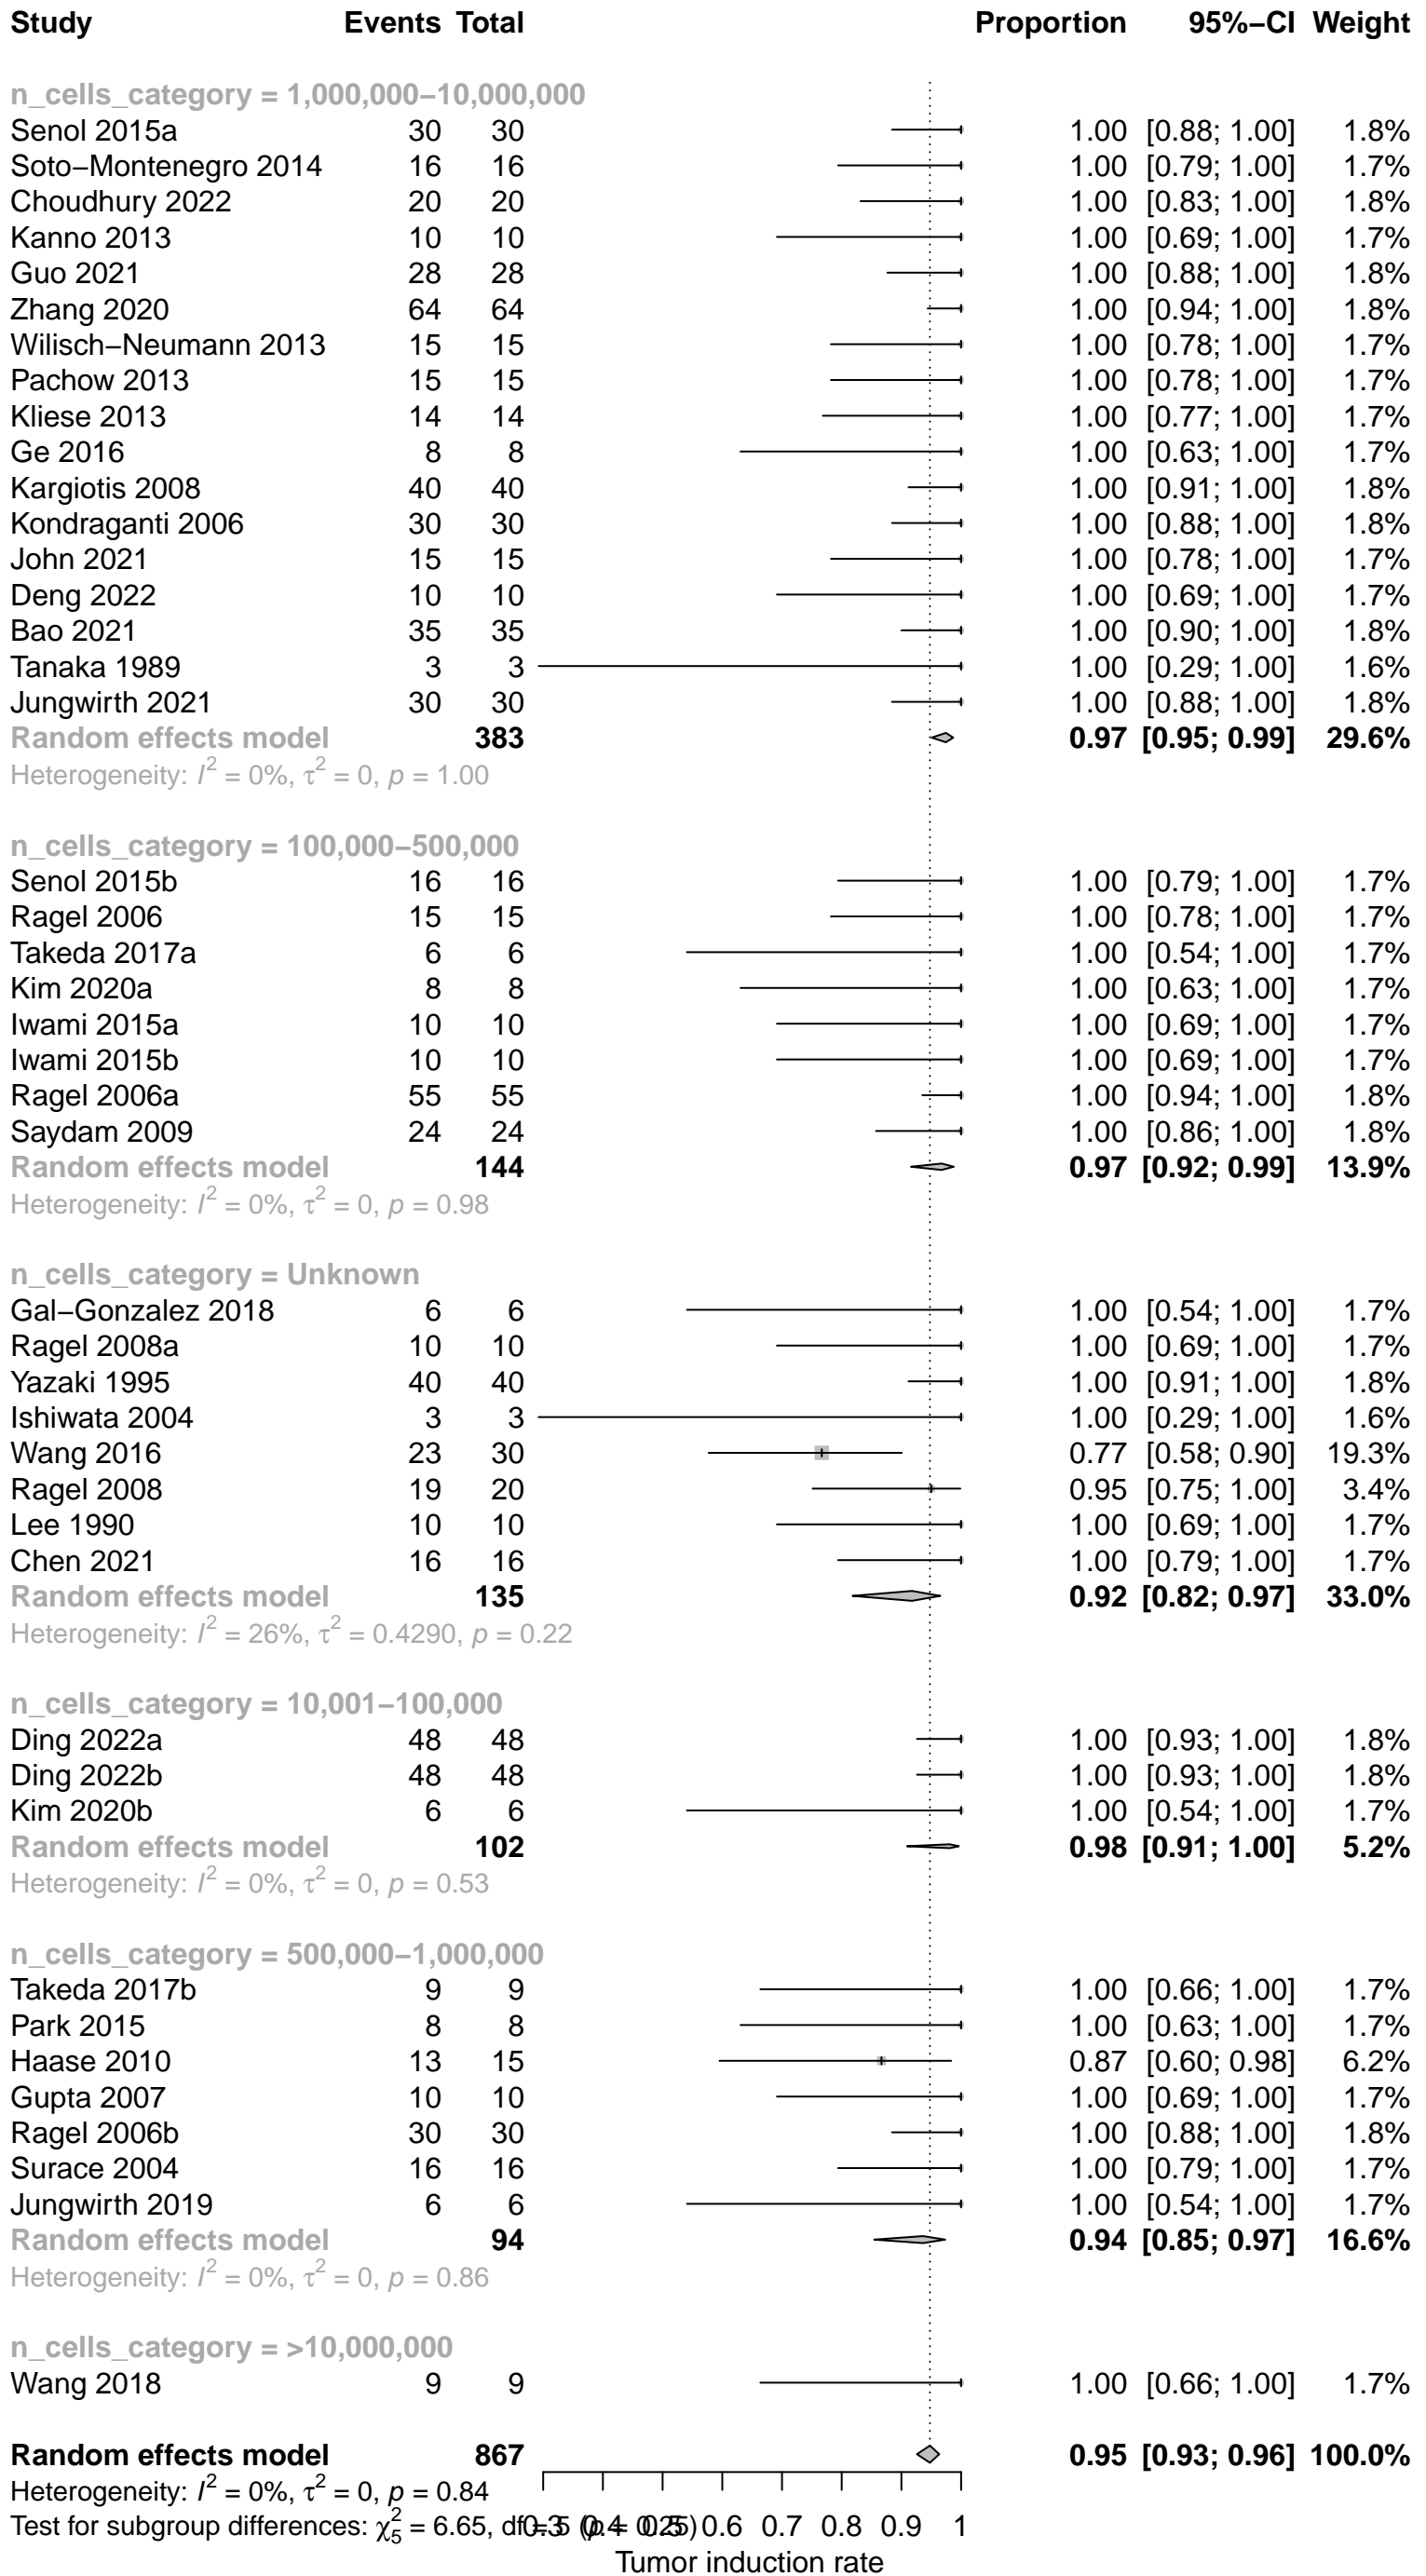

ECLM-ortho-number of cells

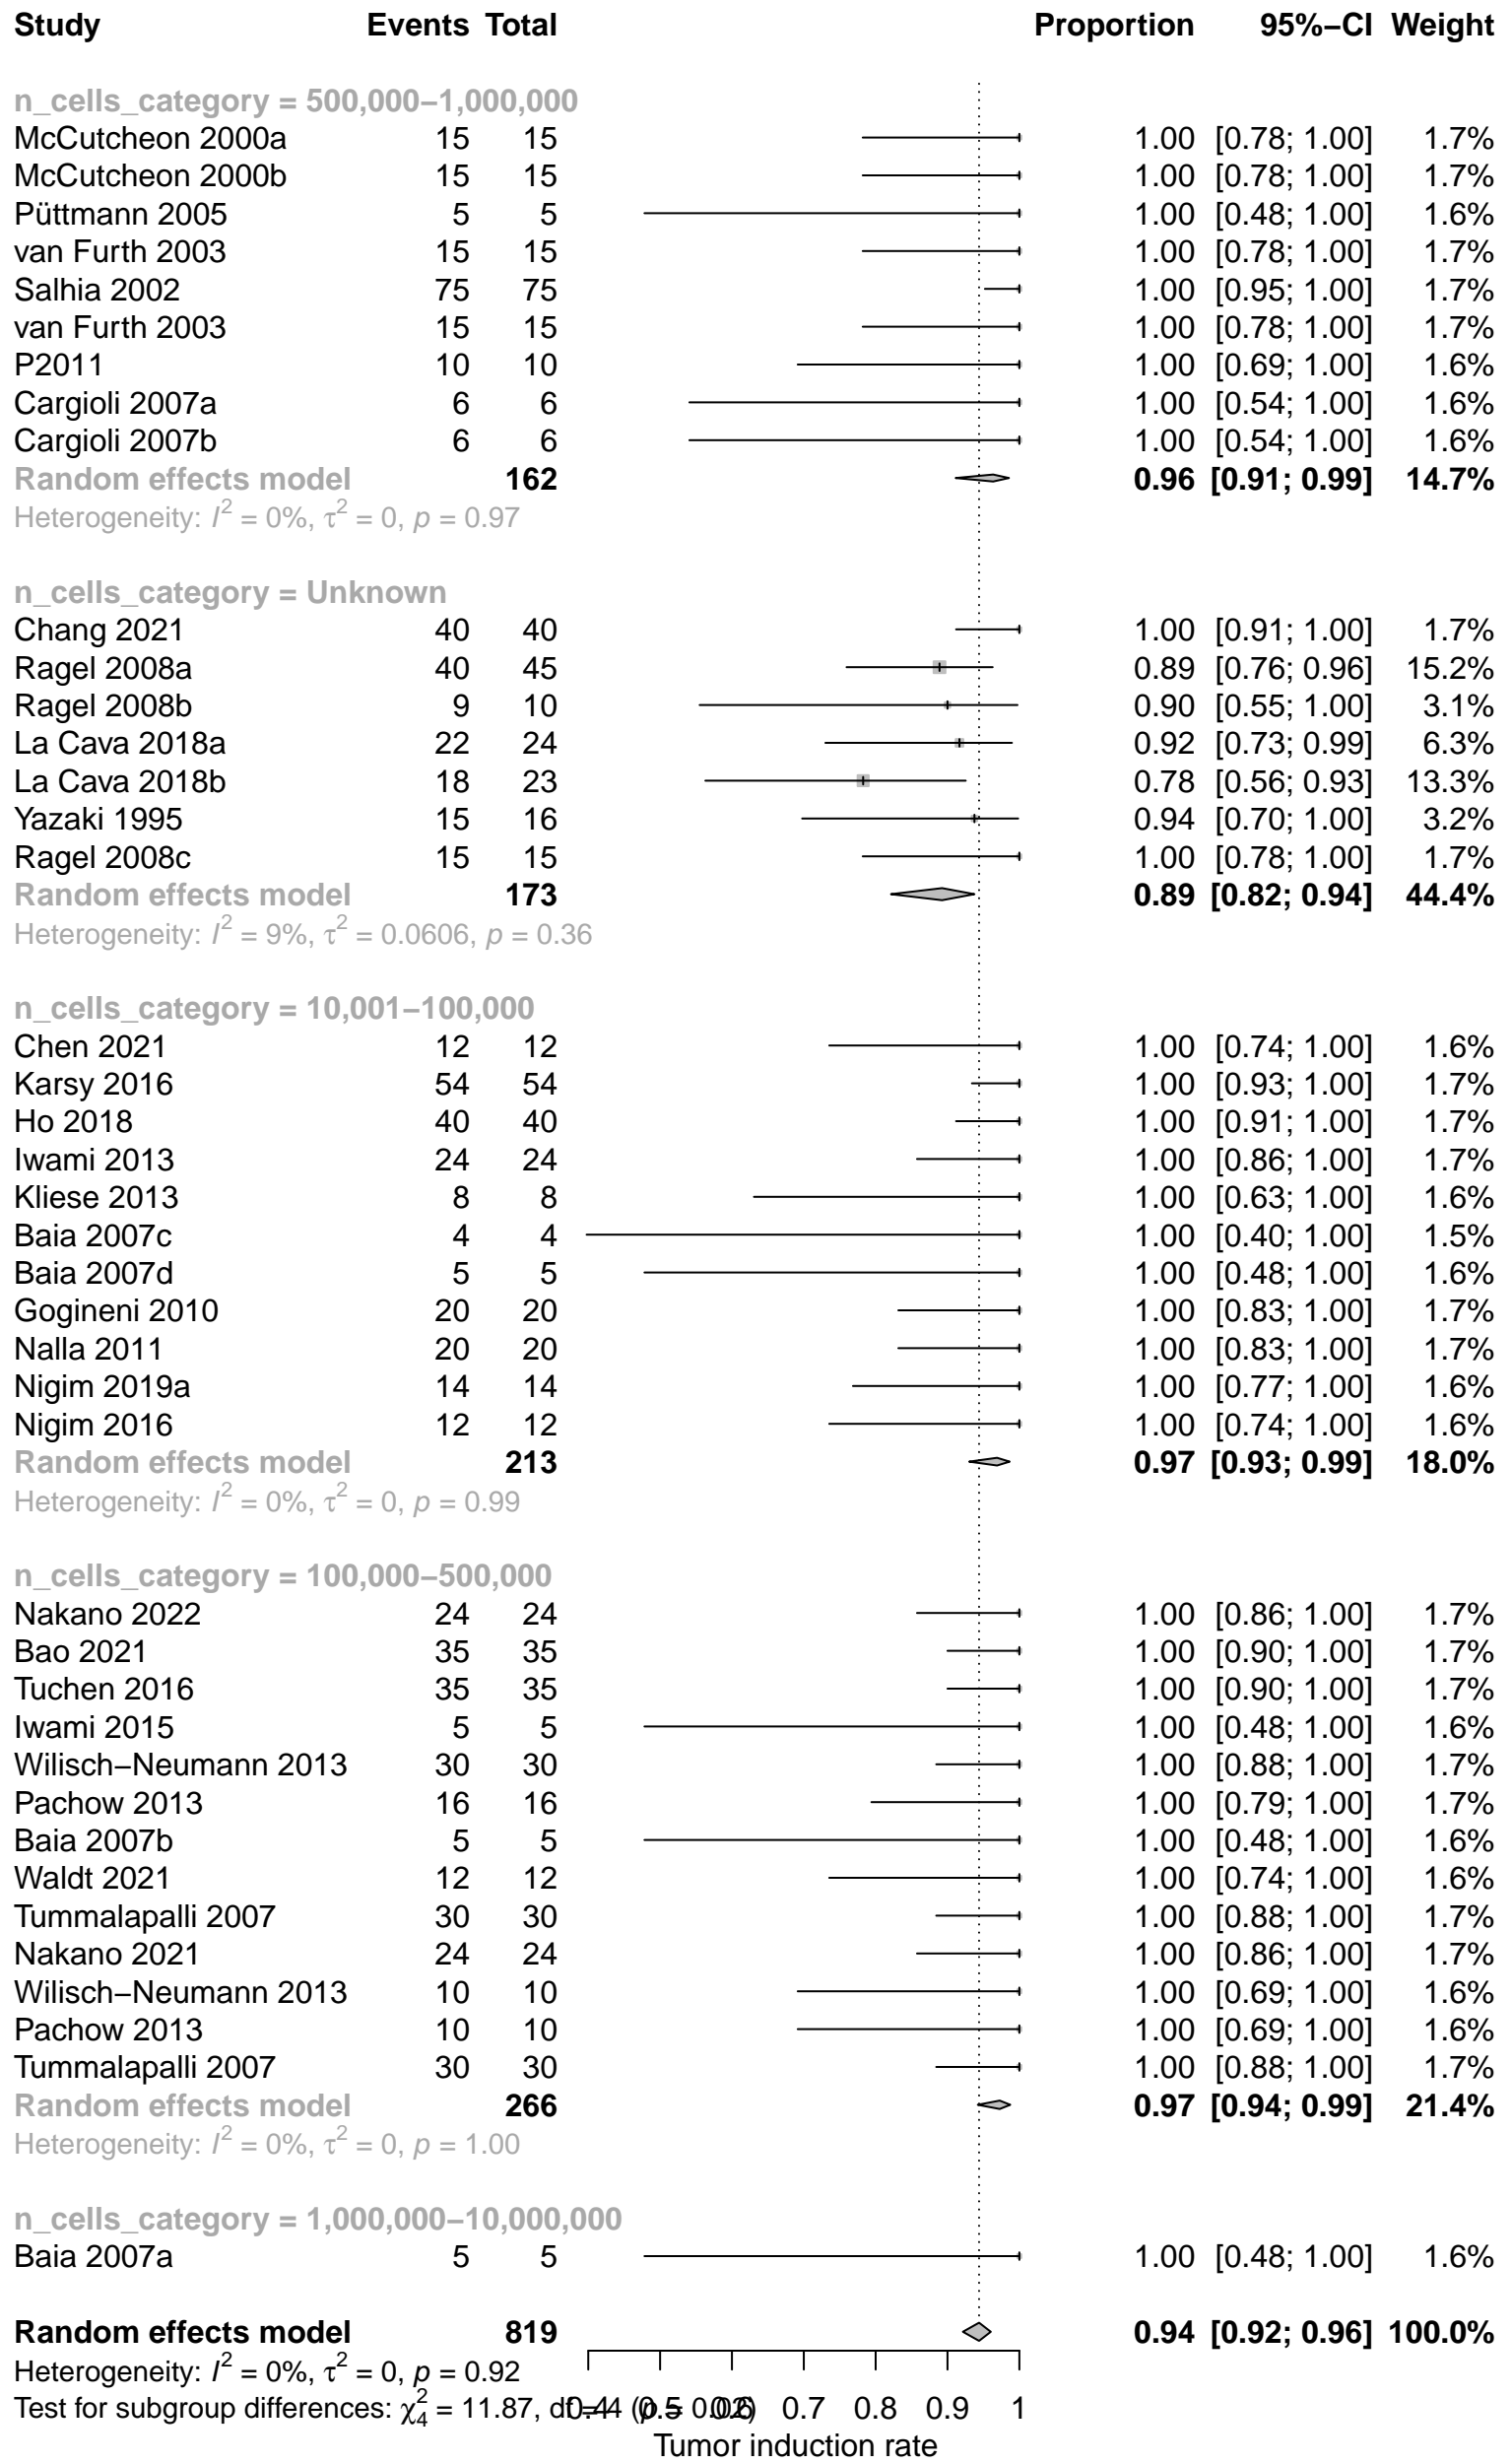

PTM-hetero-number of cells

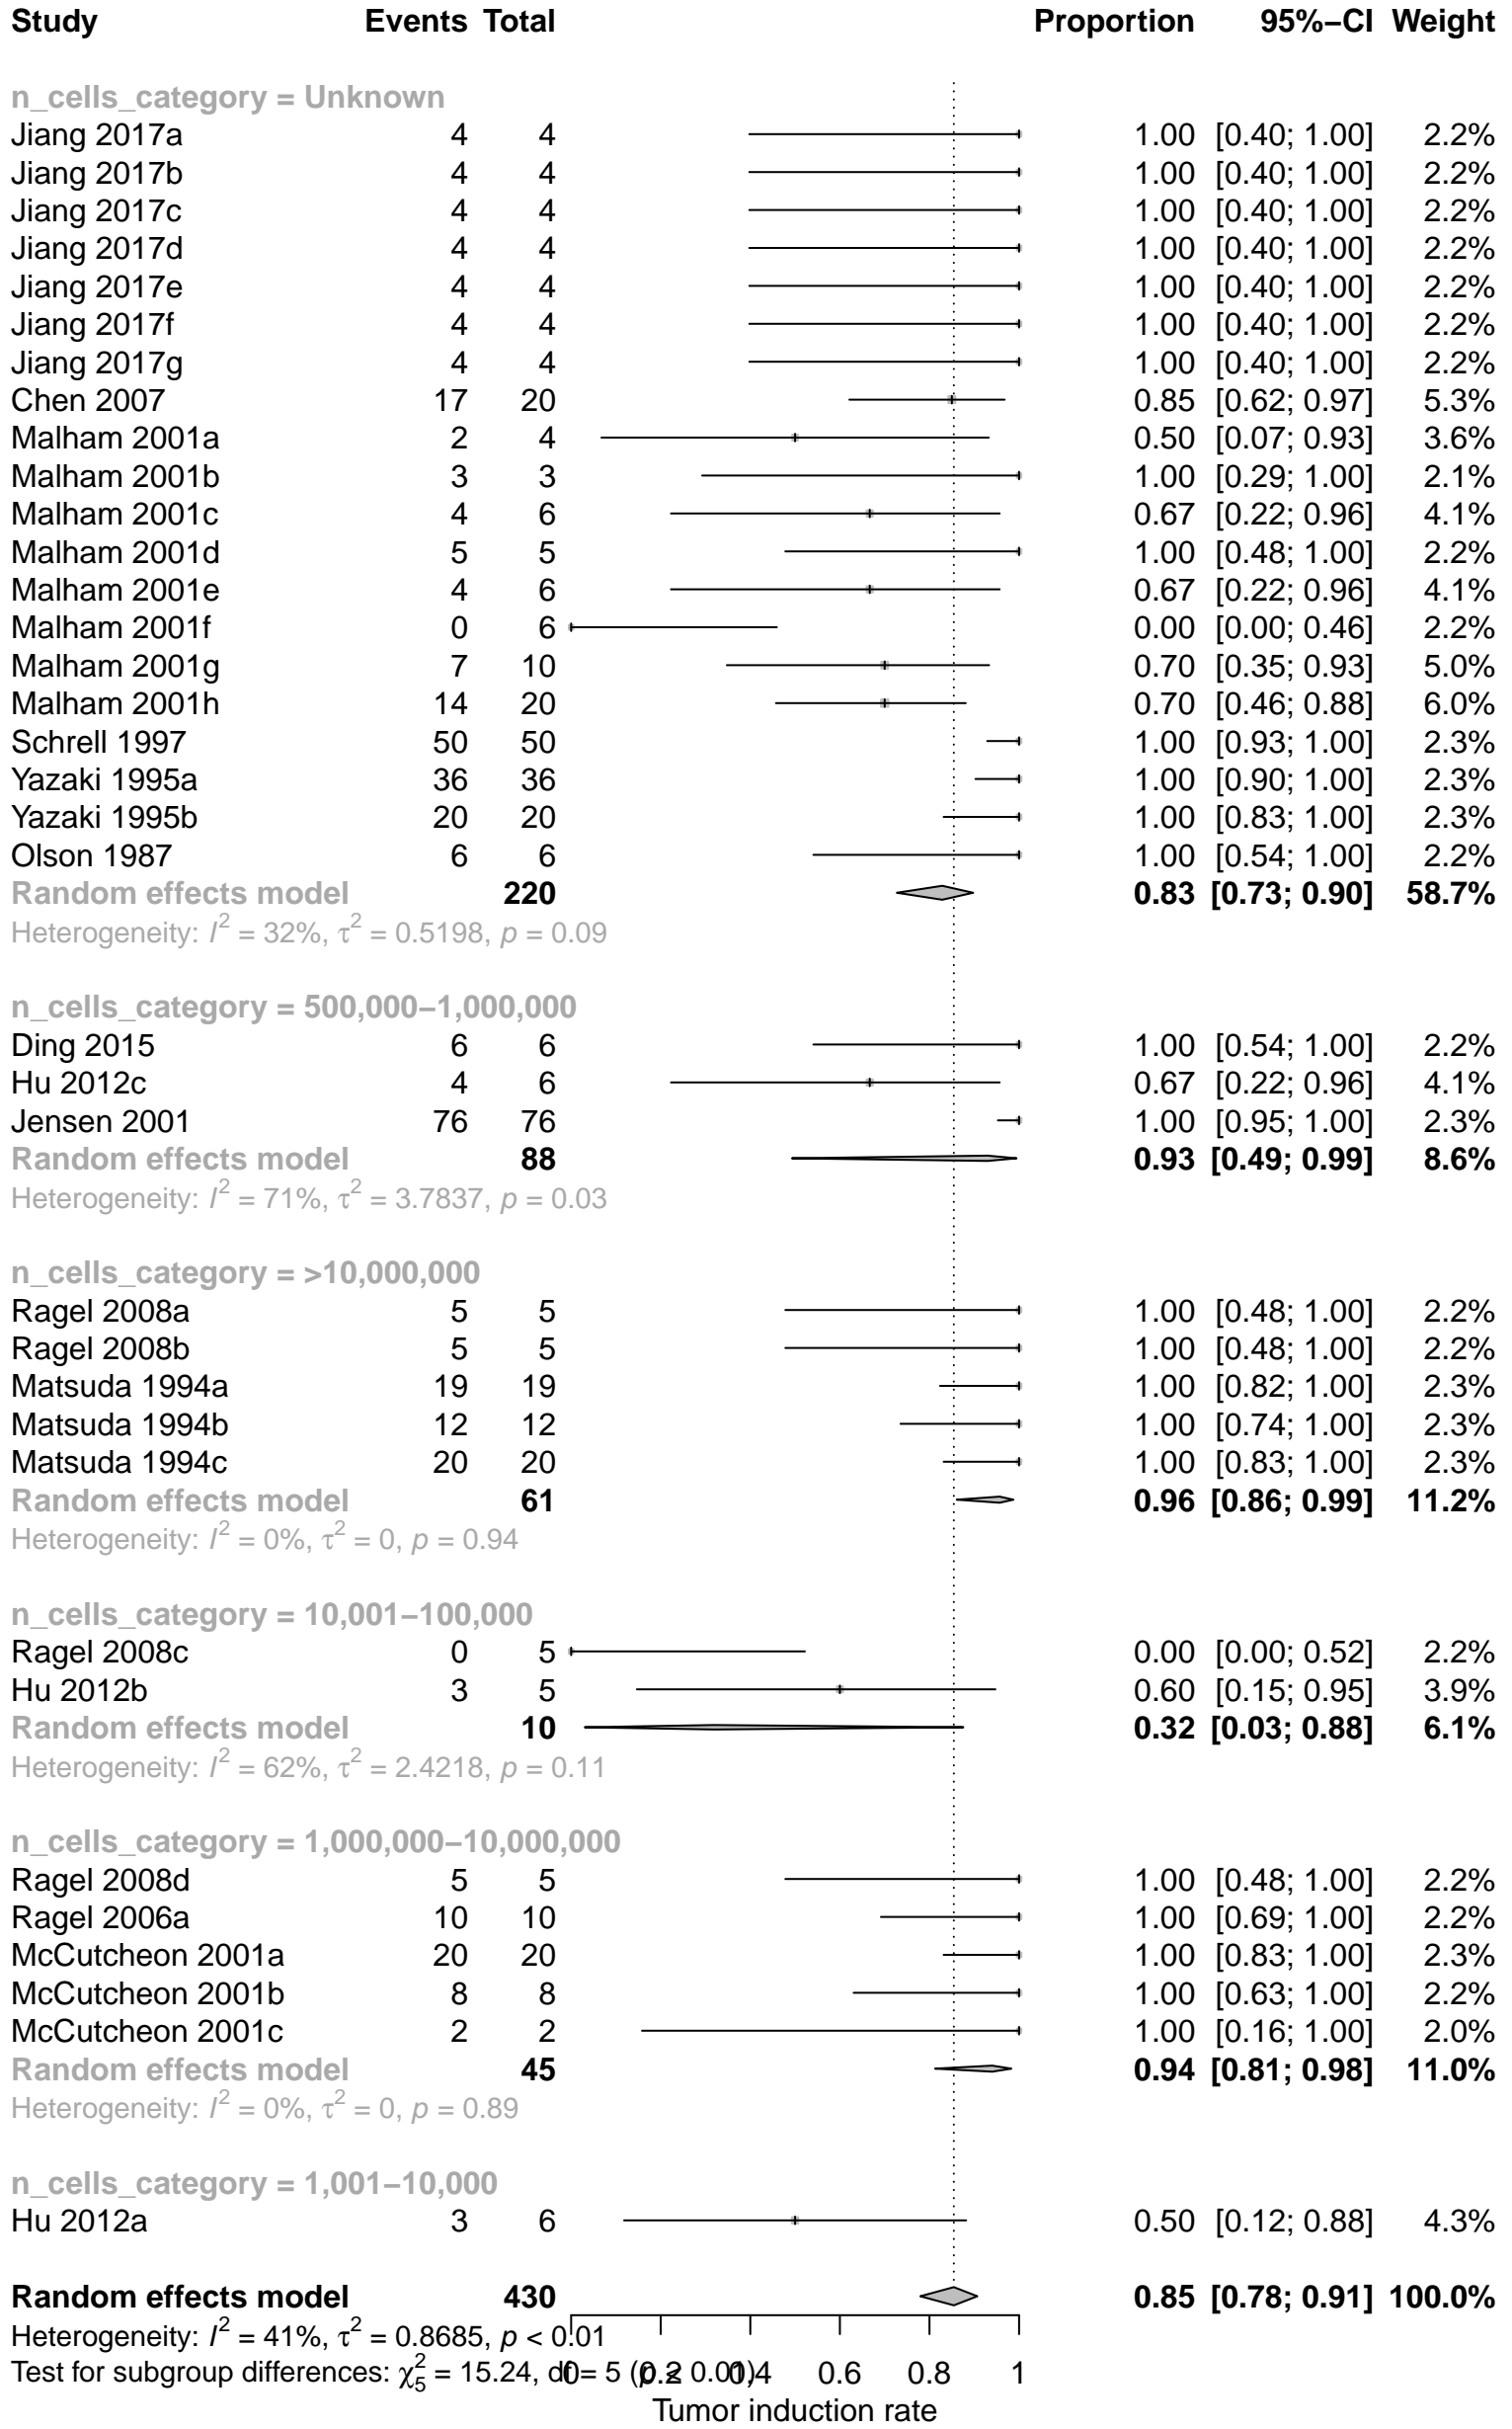

PTM-ortho-number of cells

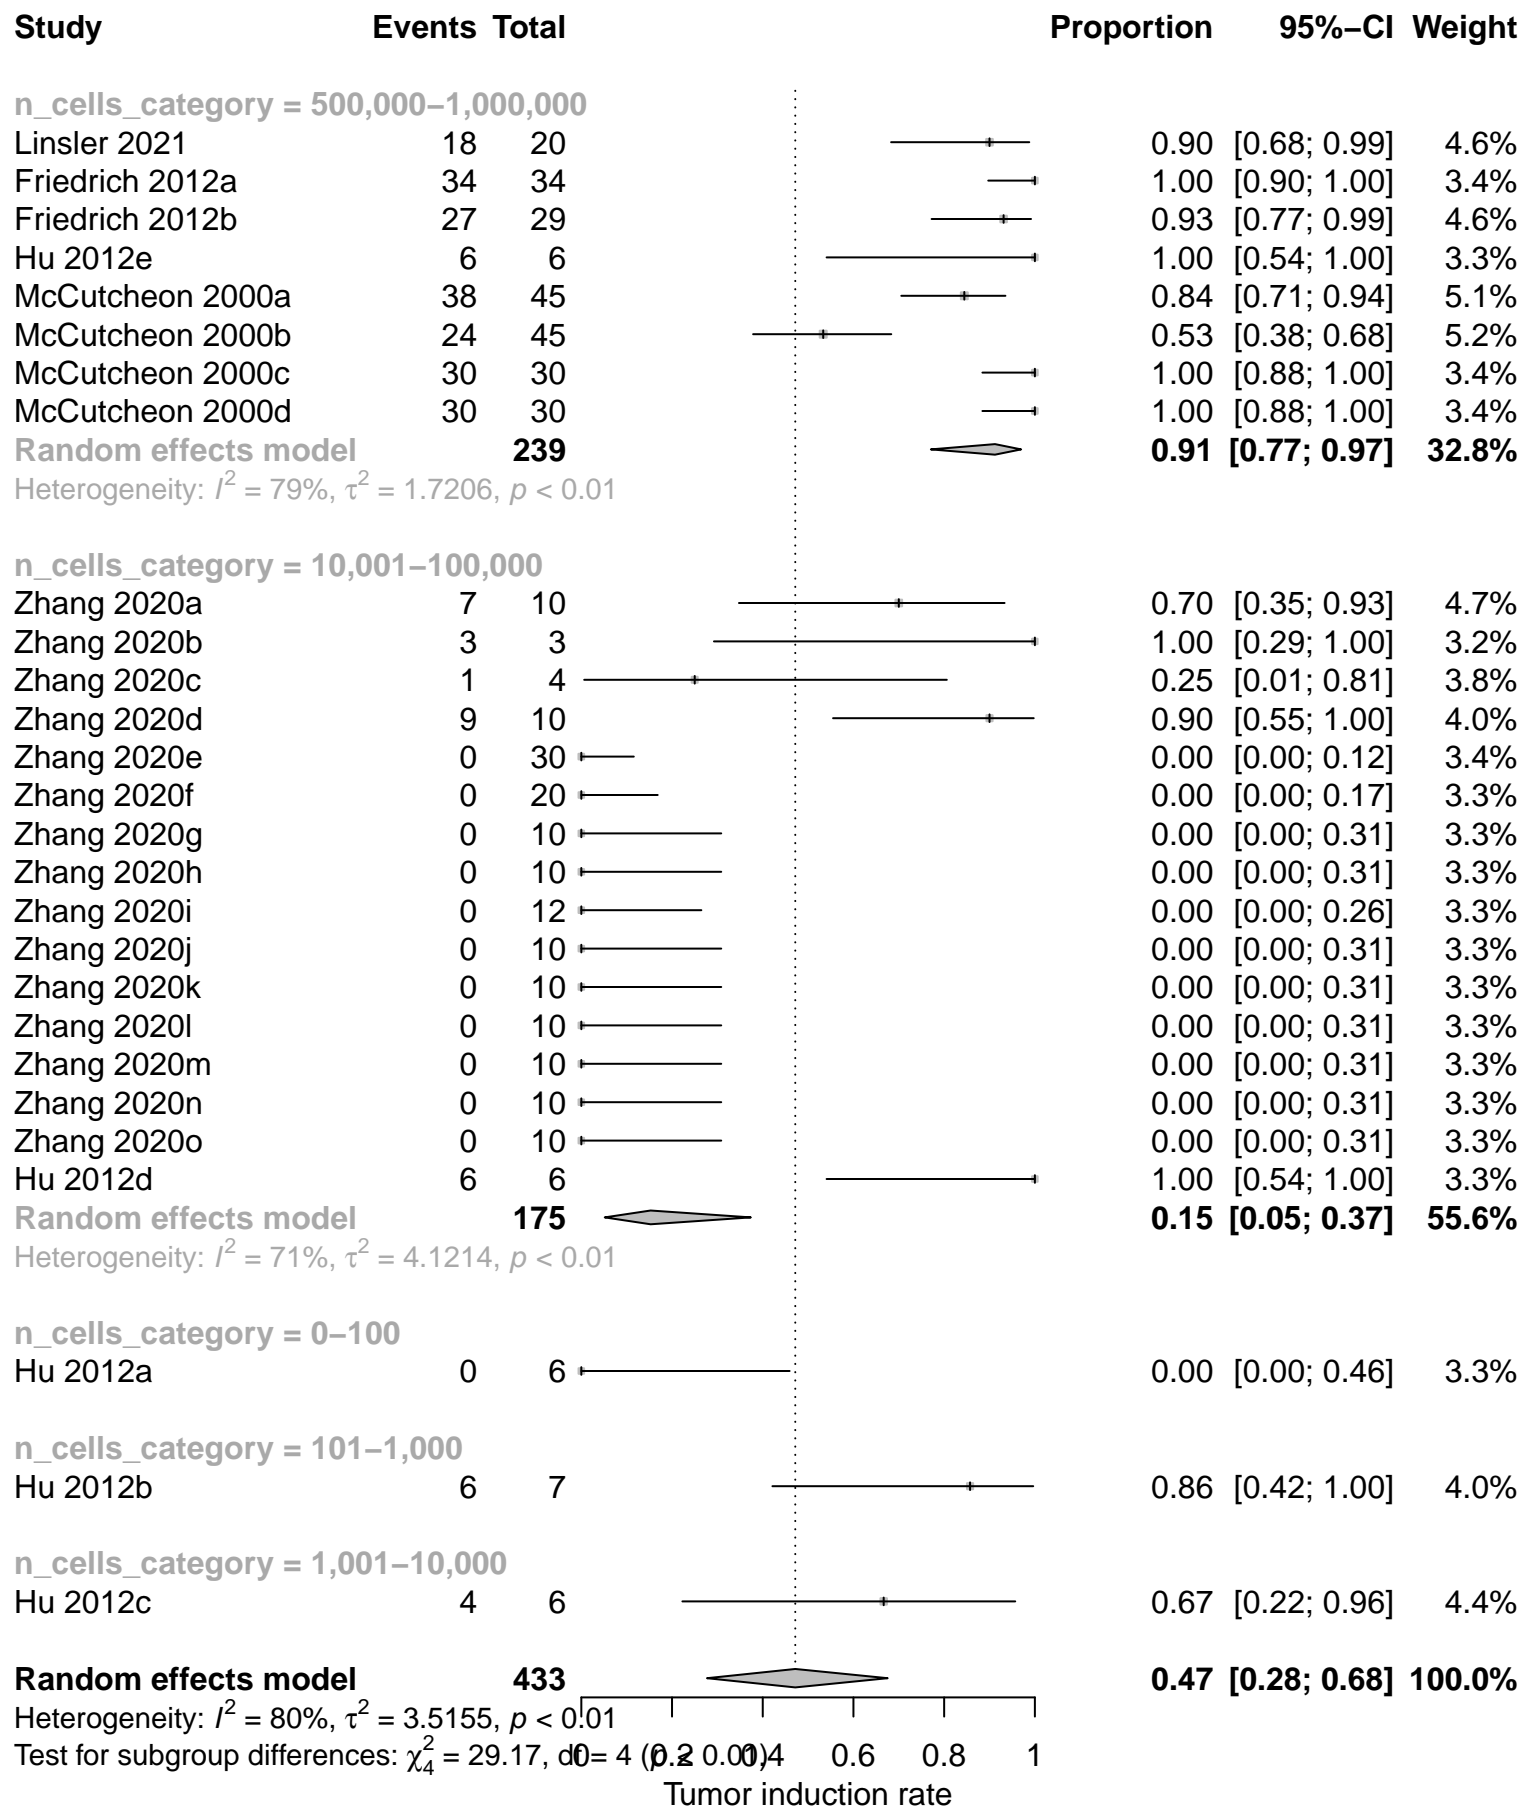

ECLM-hetero-injection volume

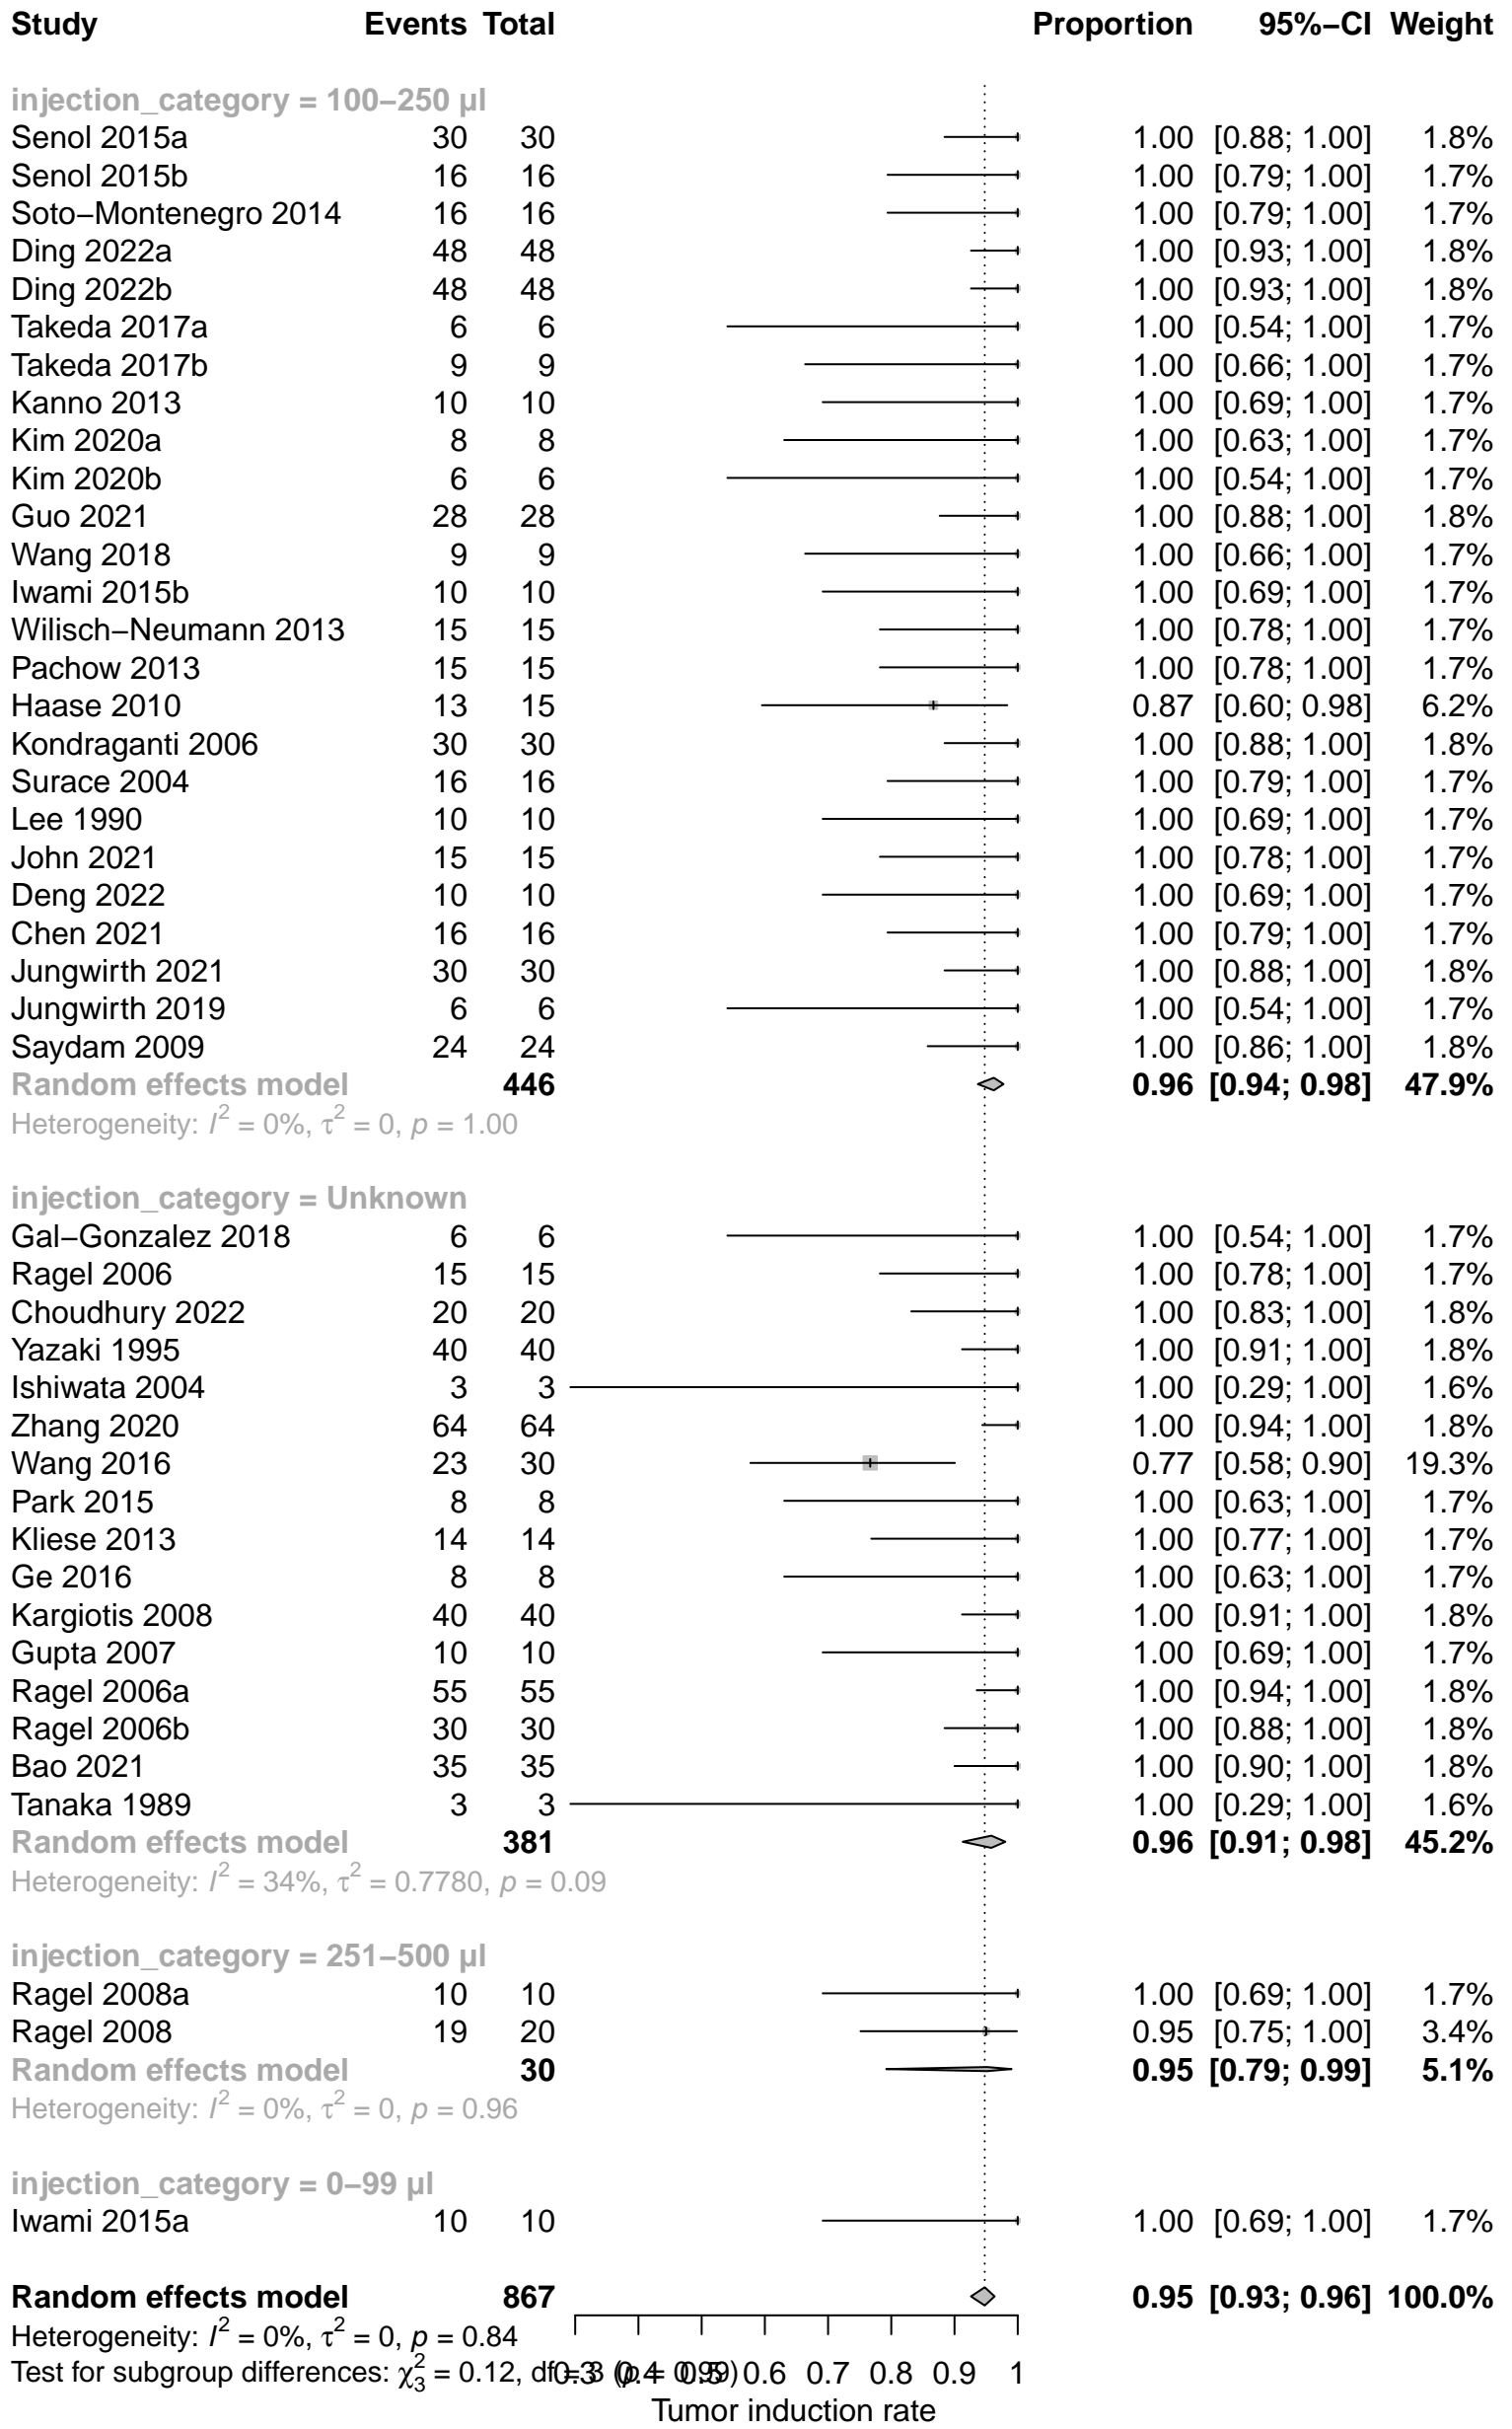

ECLM-ortho-injection volume

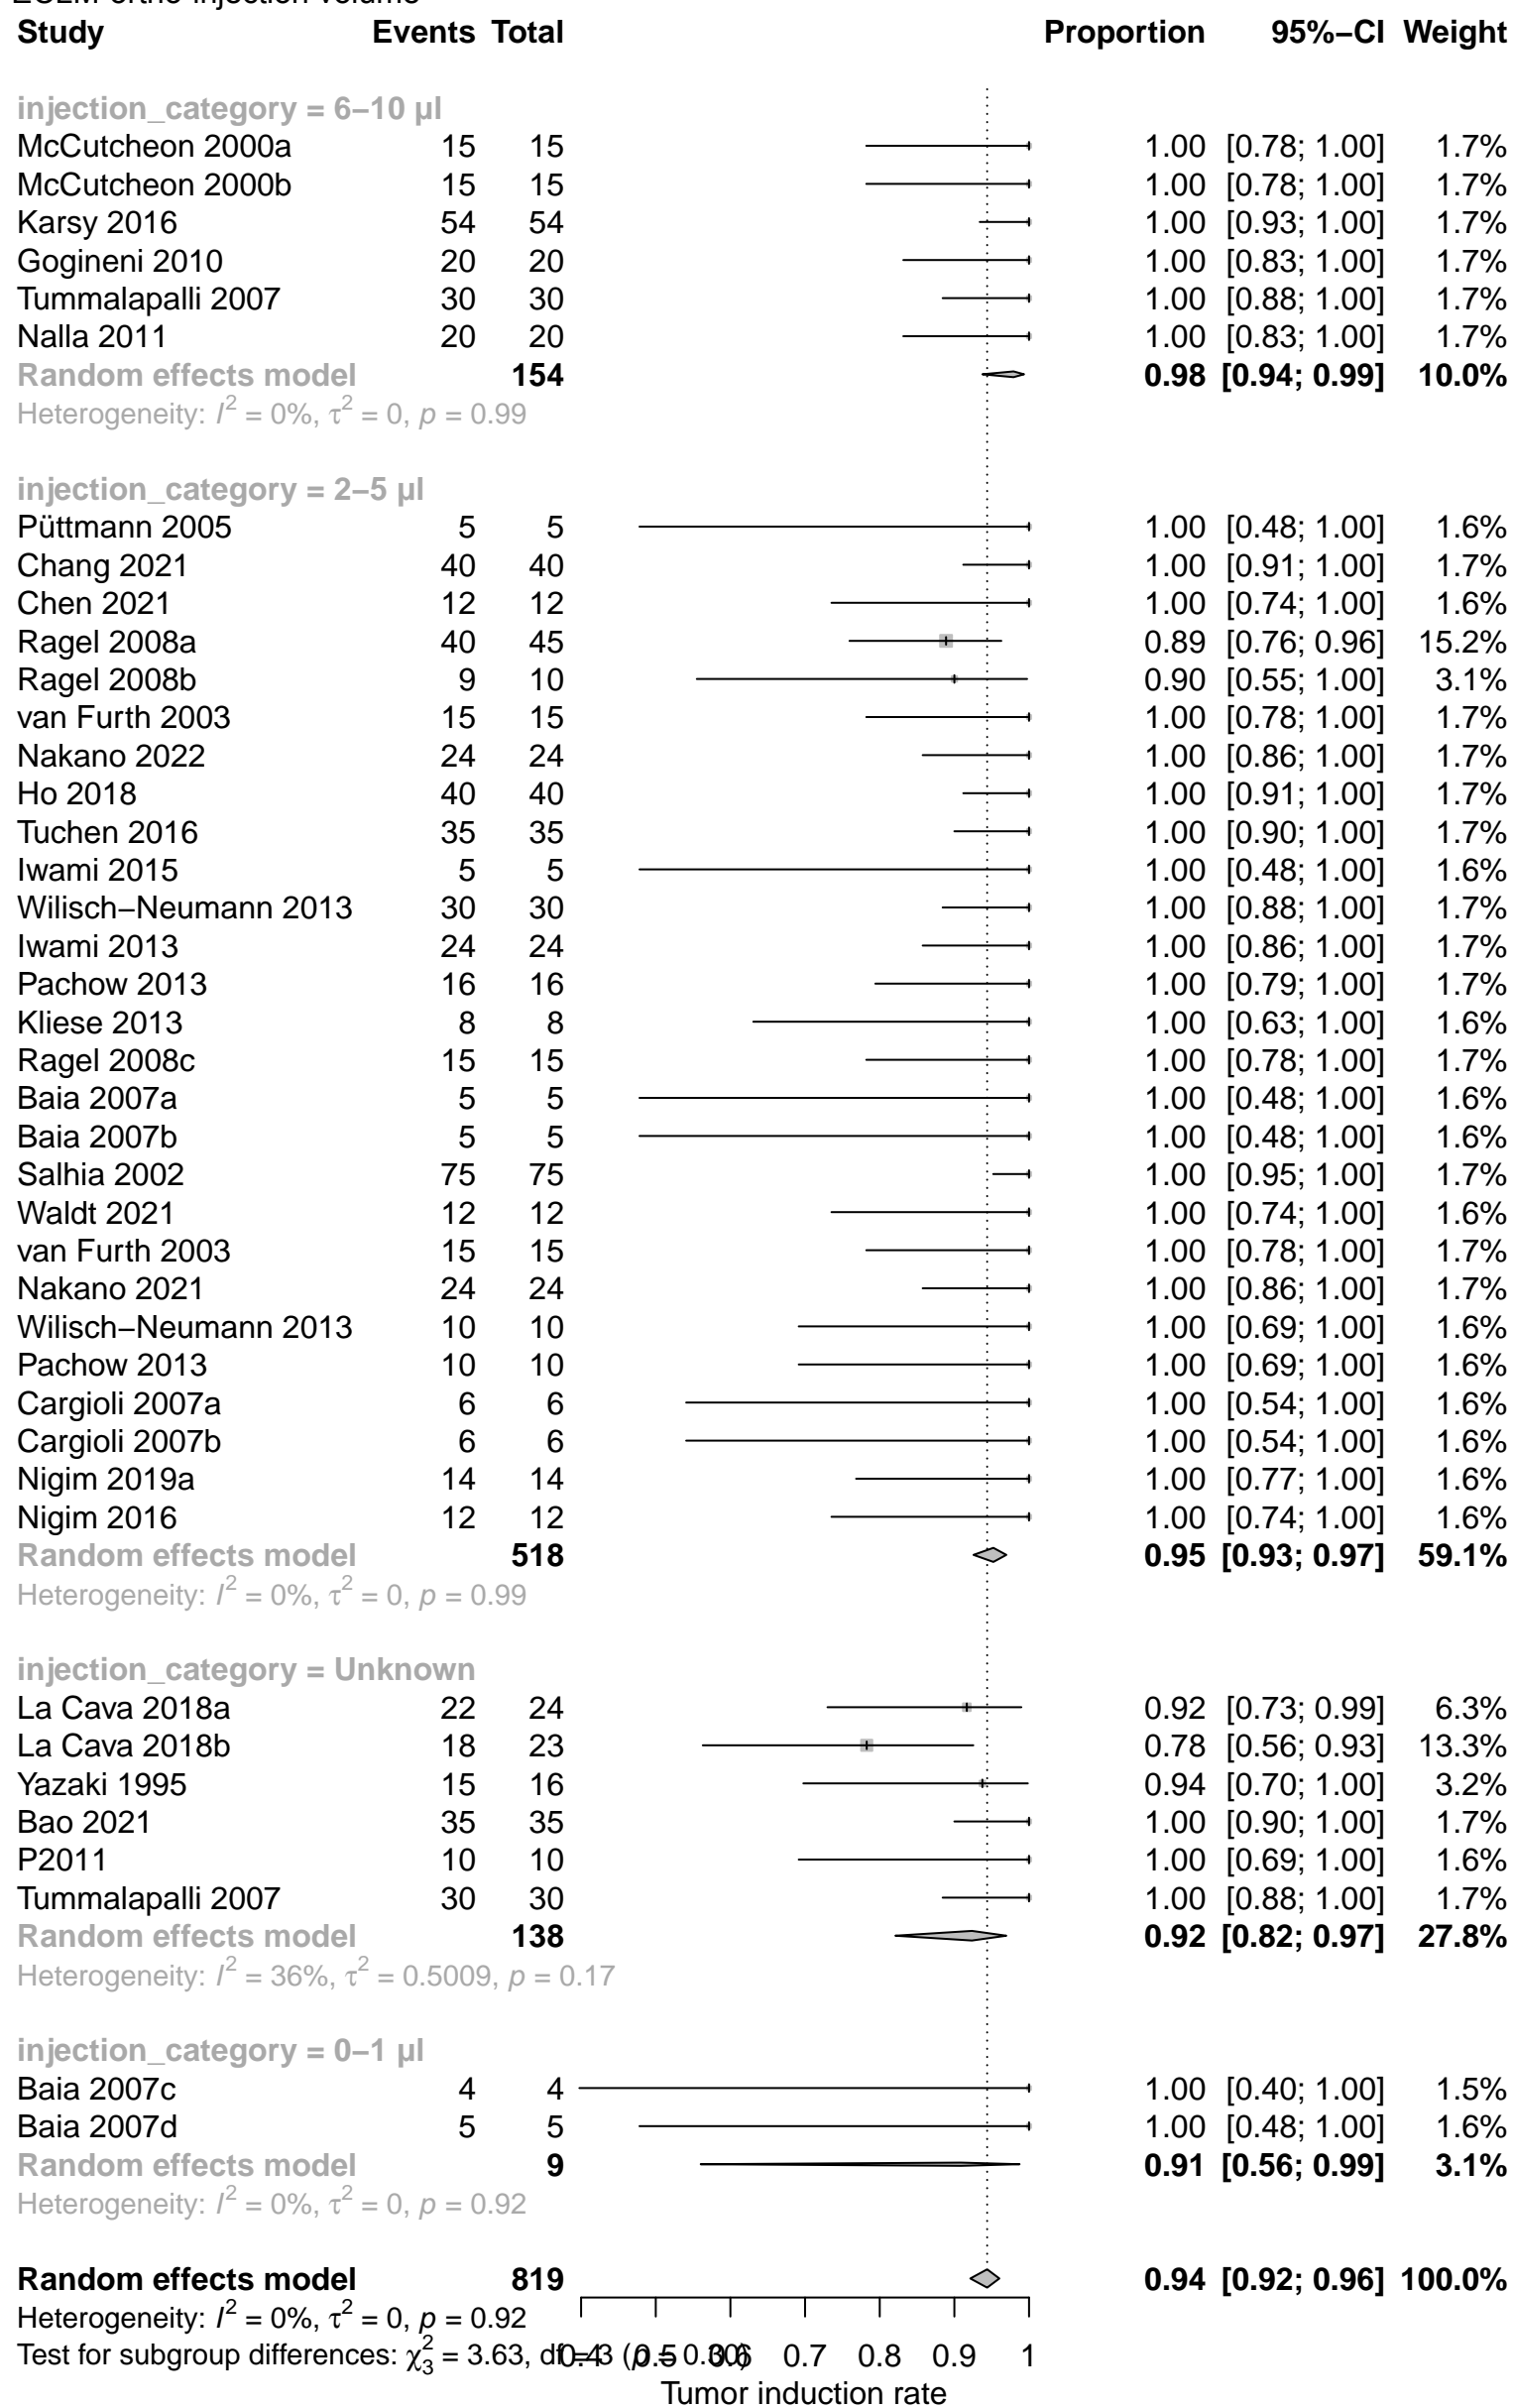



PTM-hetero-injection volume

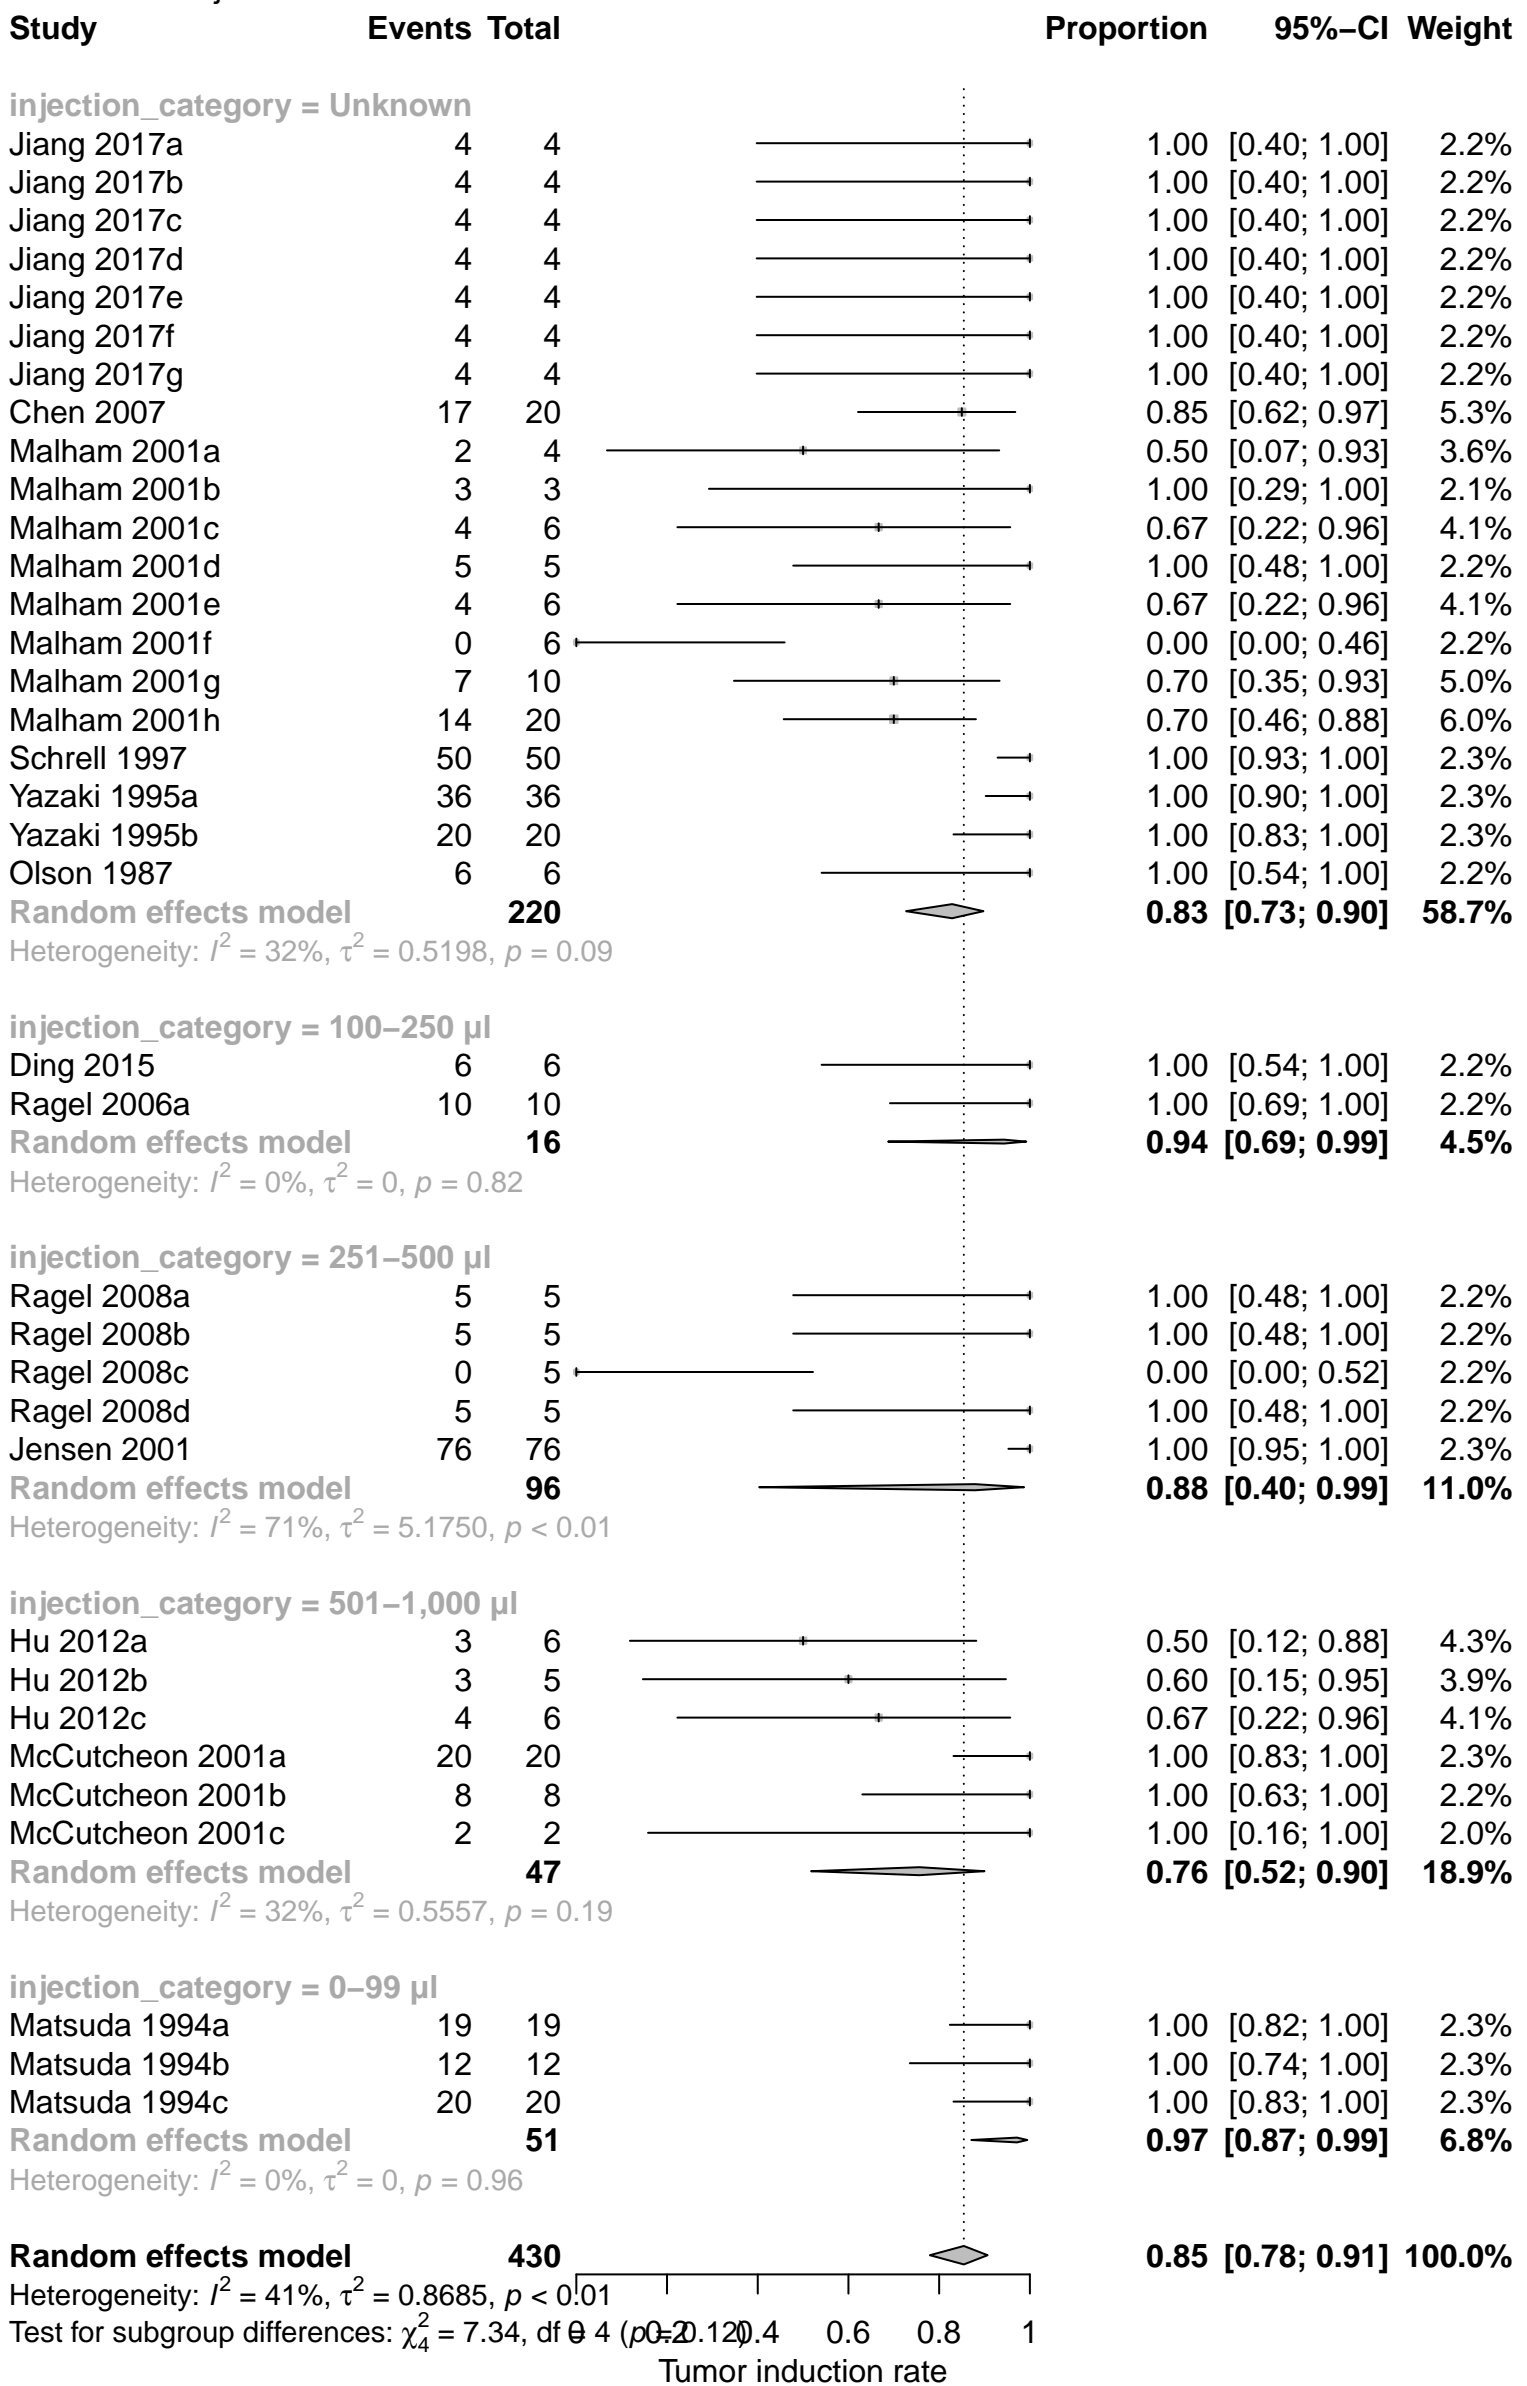

PTM-ortho-injection volume

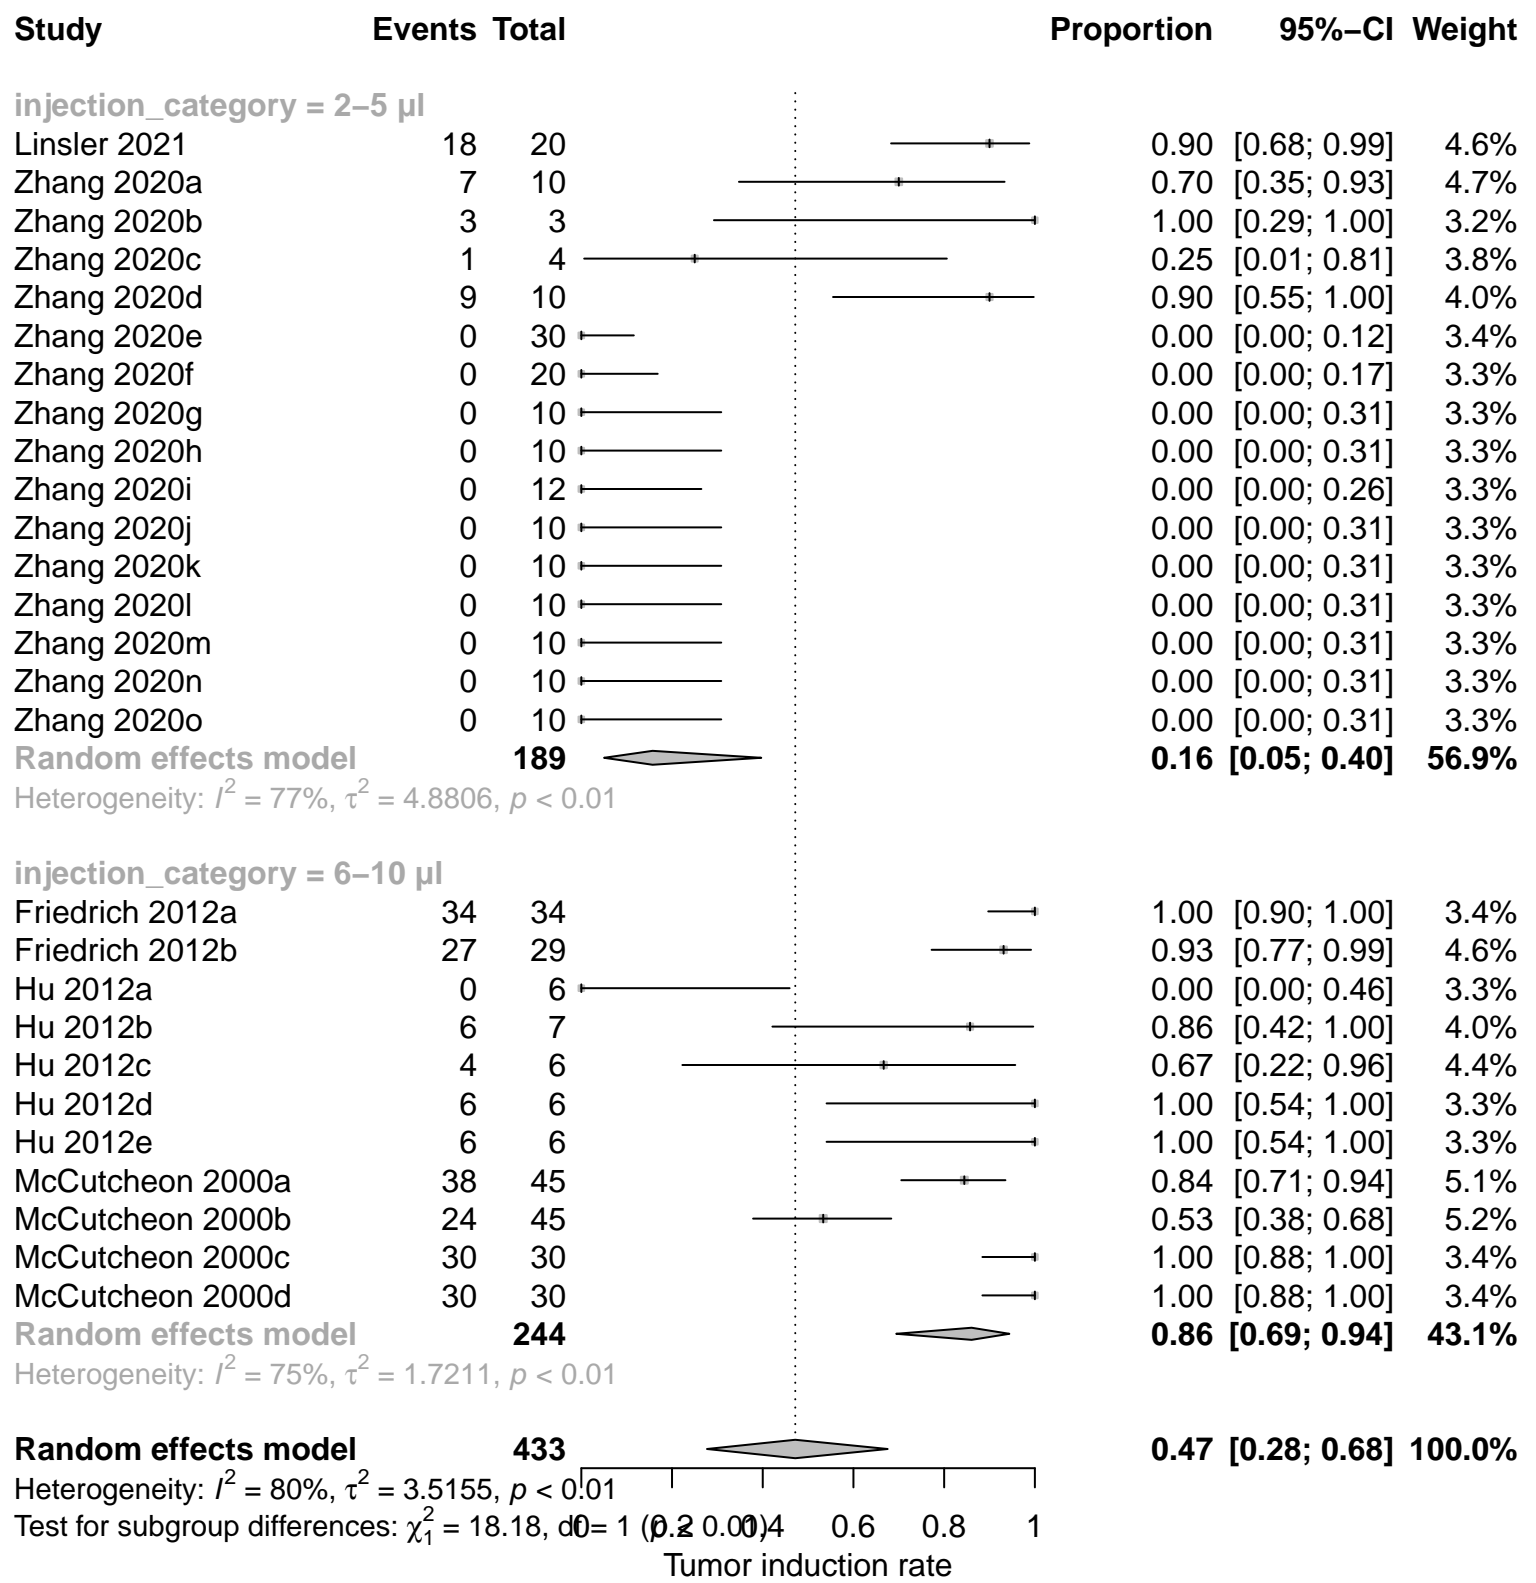

ECLM-hetero-cell line

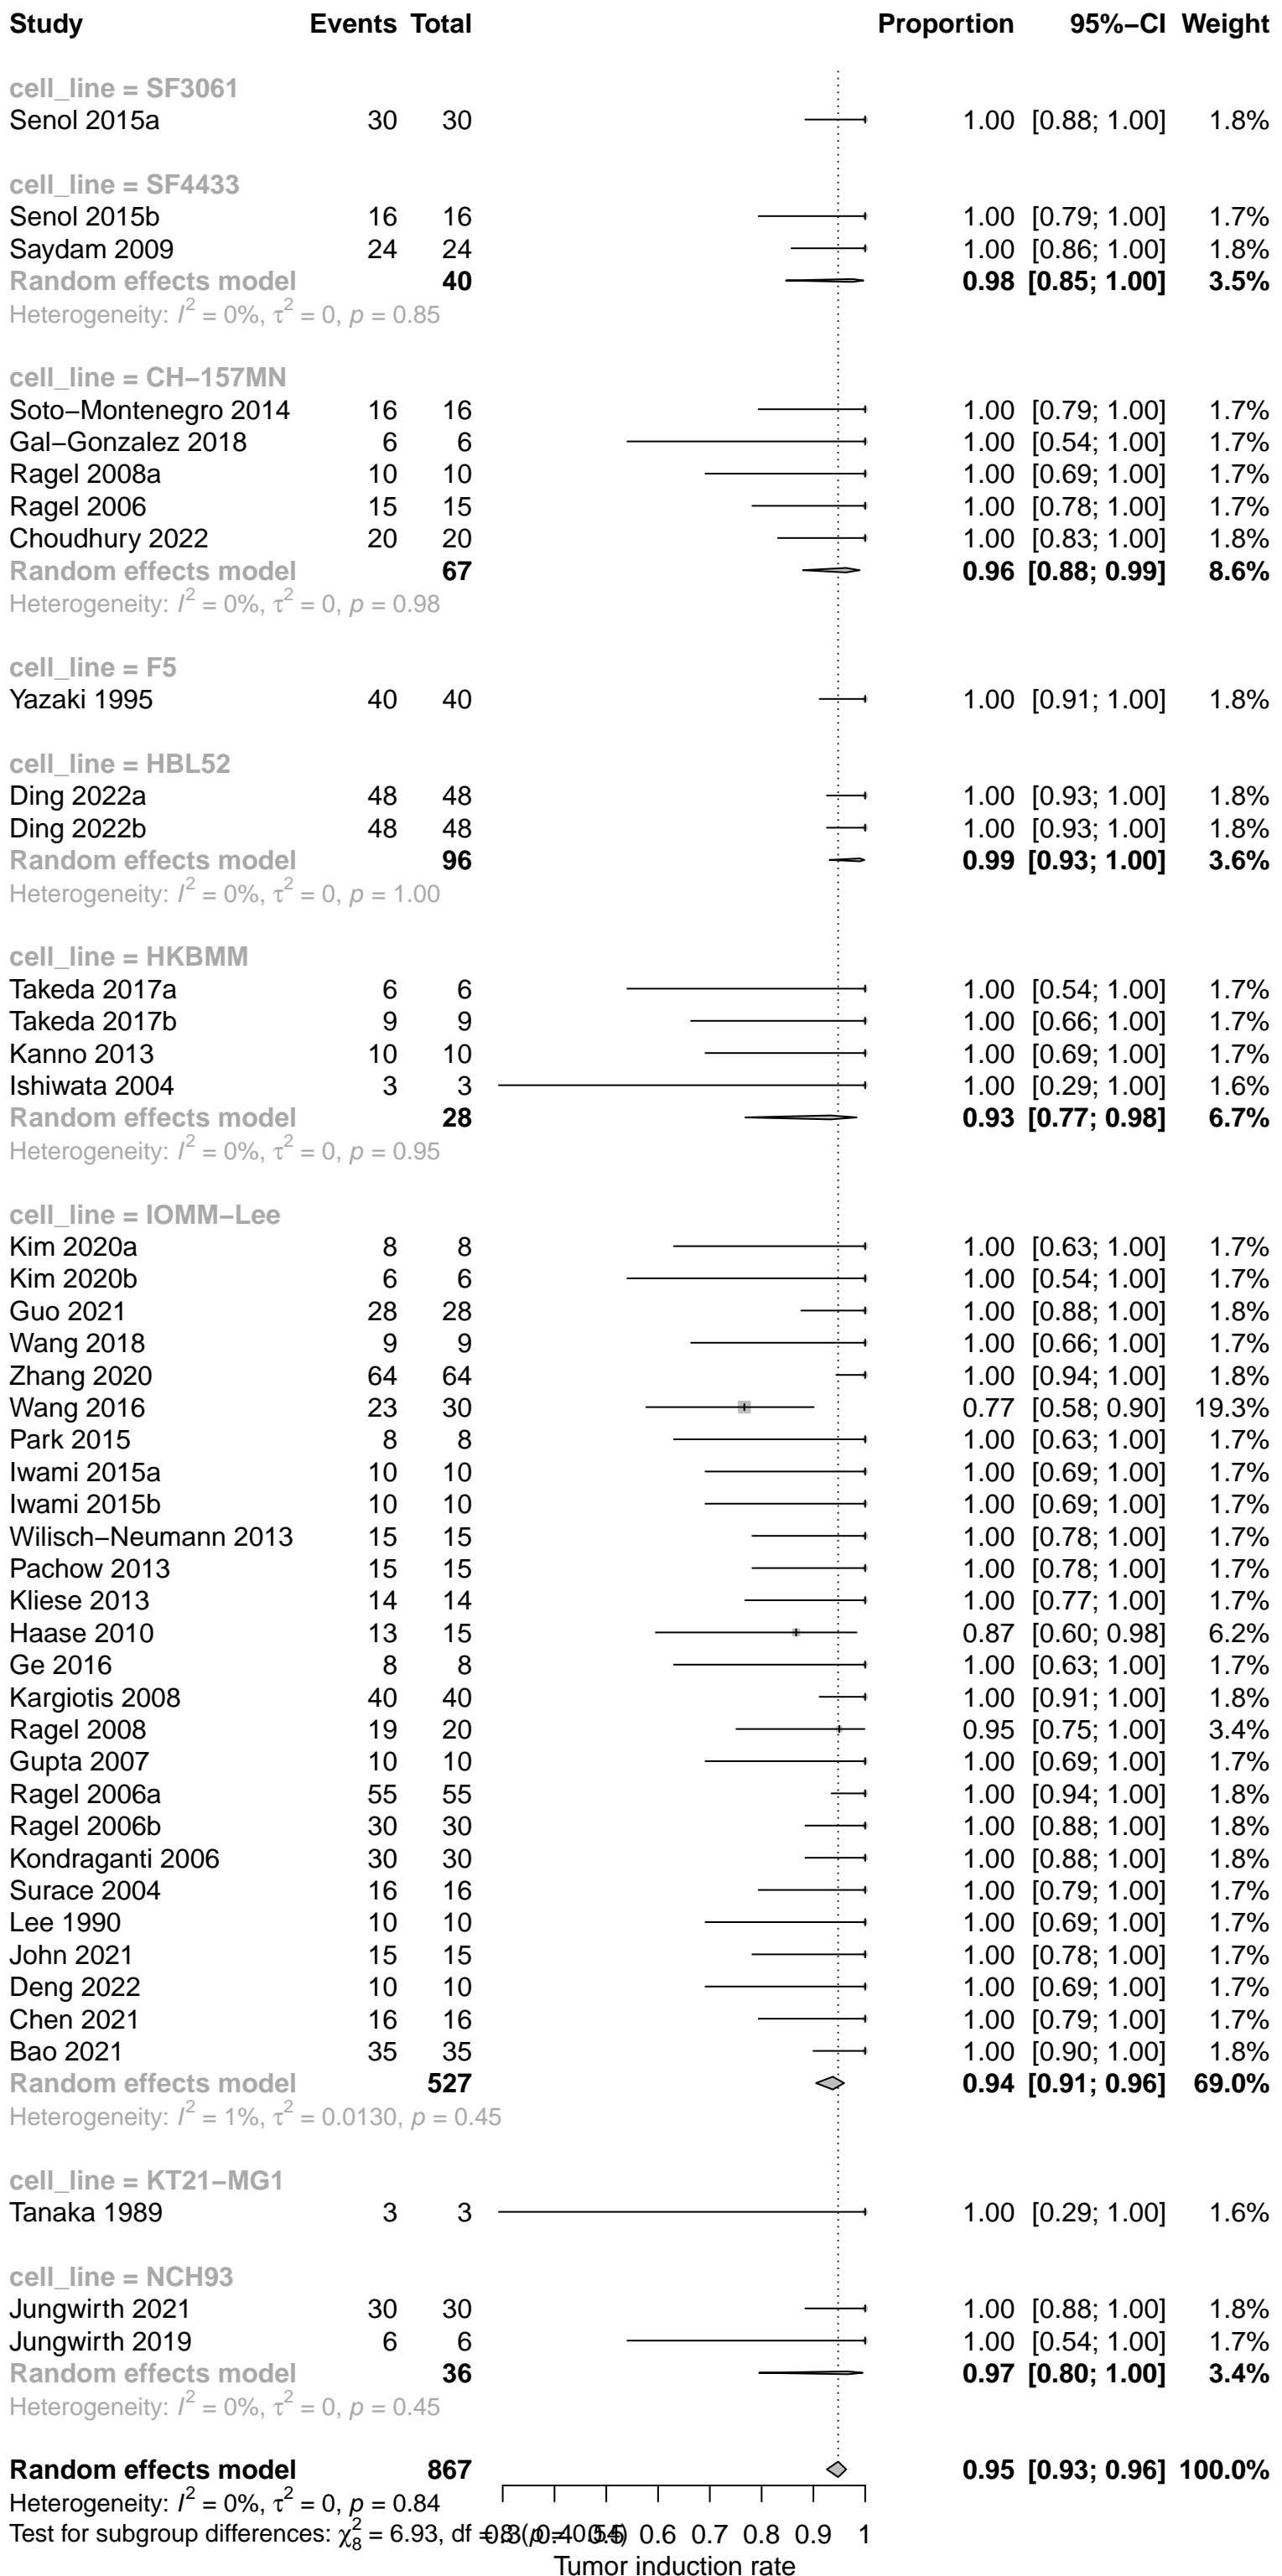

ECLM-ortho-cell line

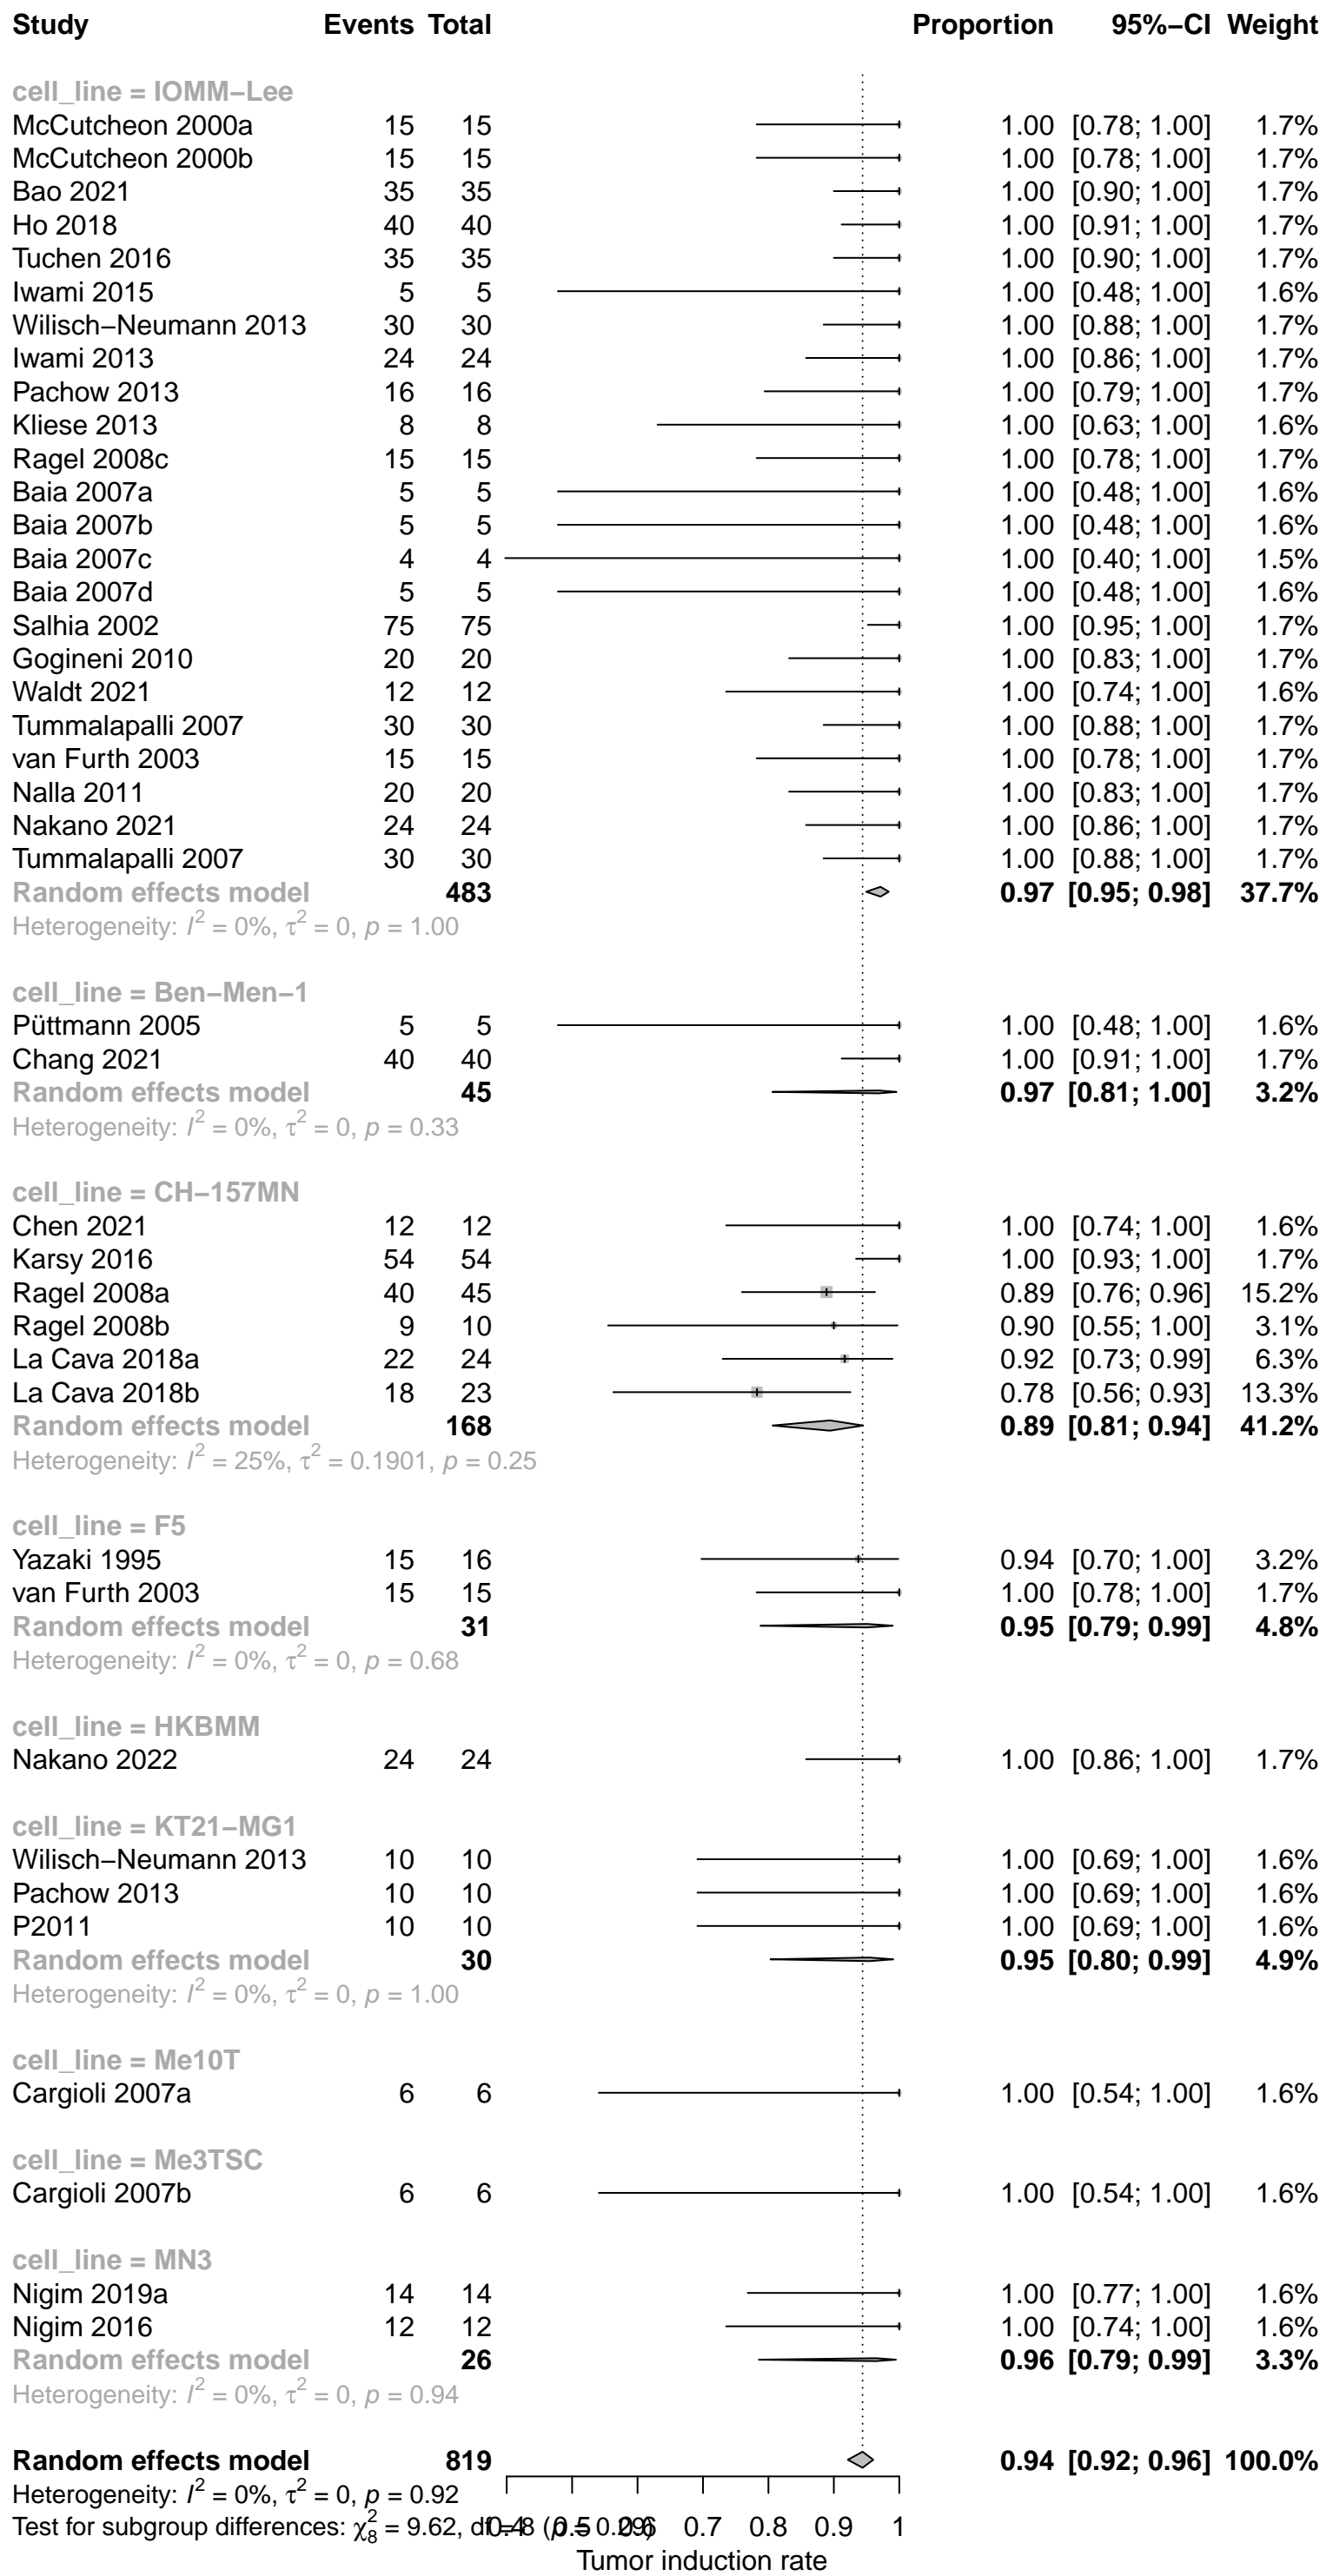

PTM-hetero-WHO-grade

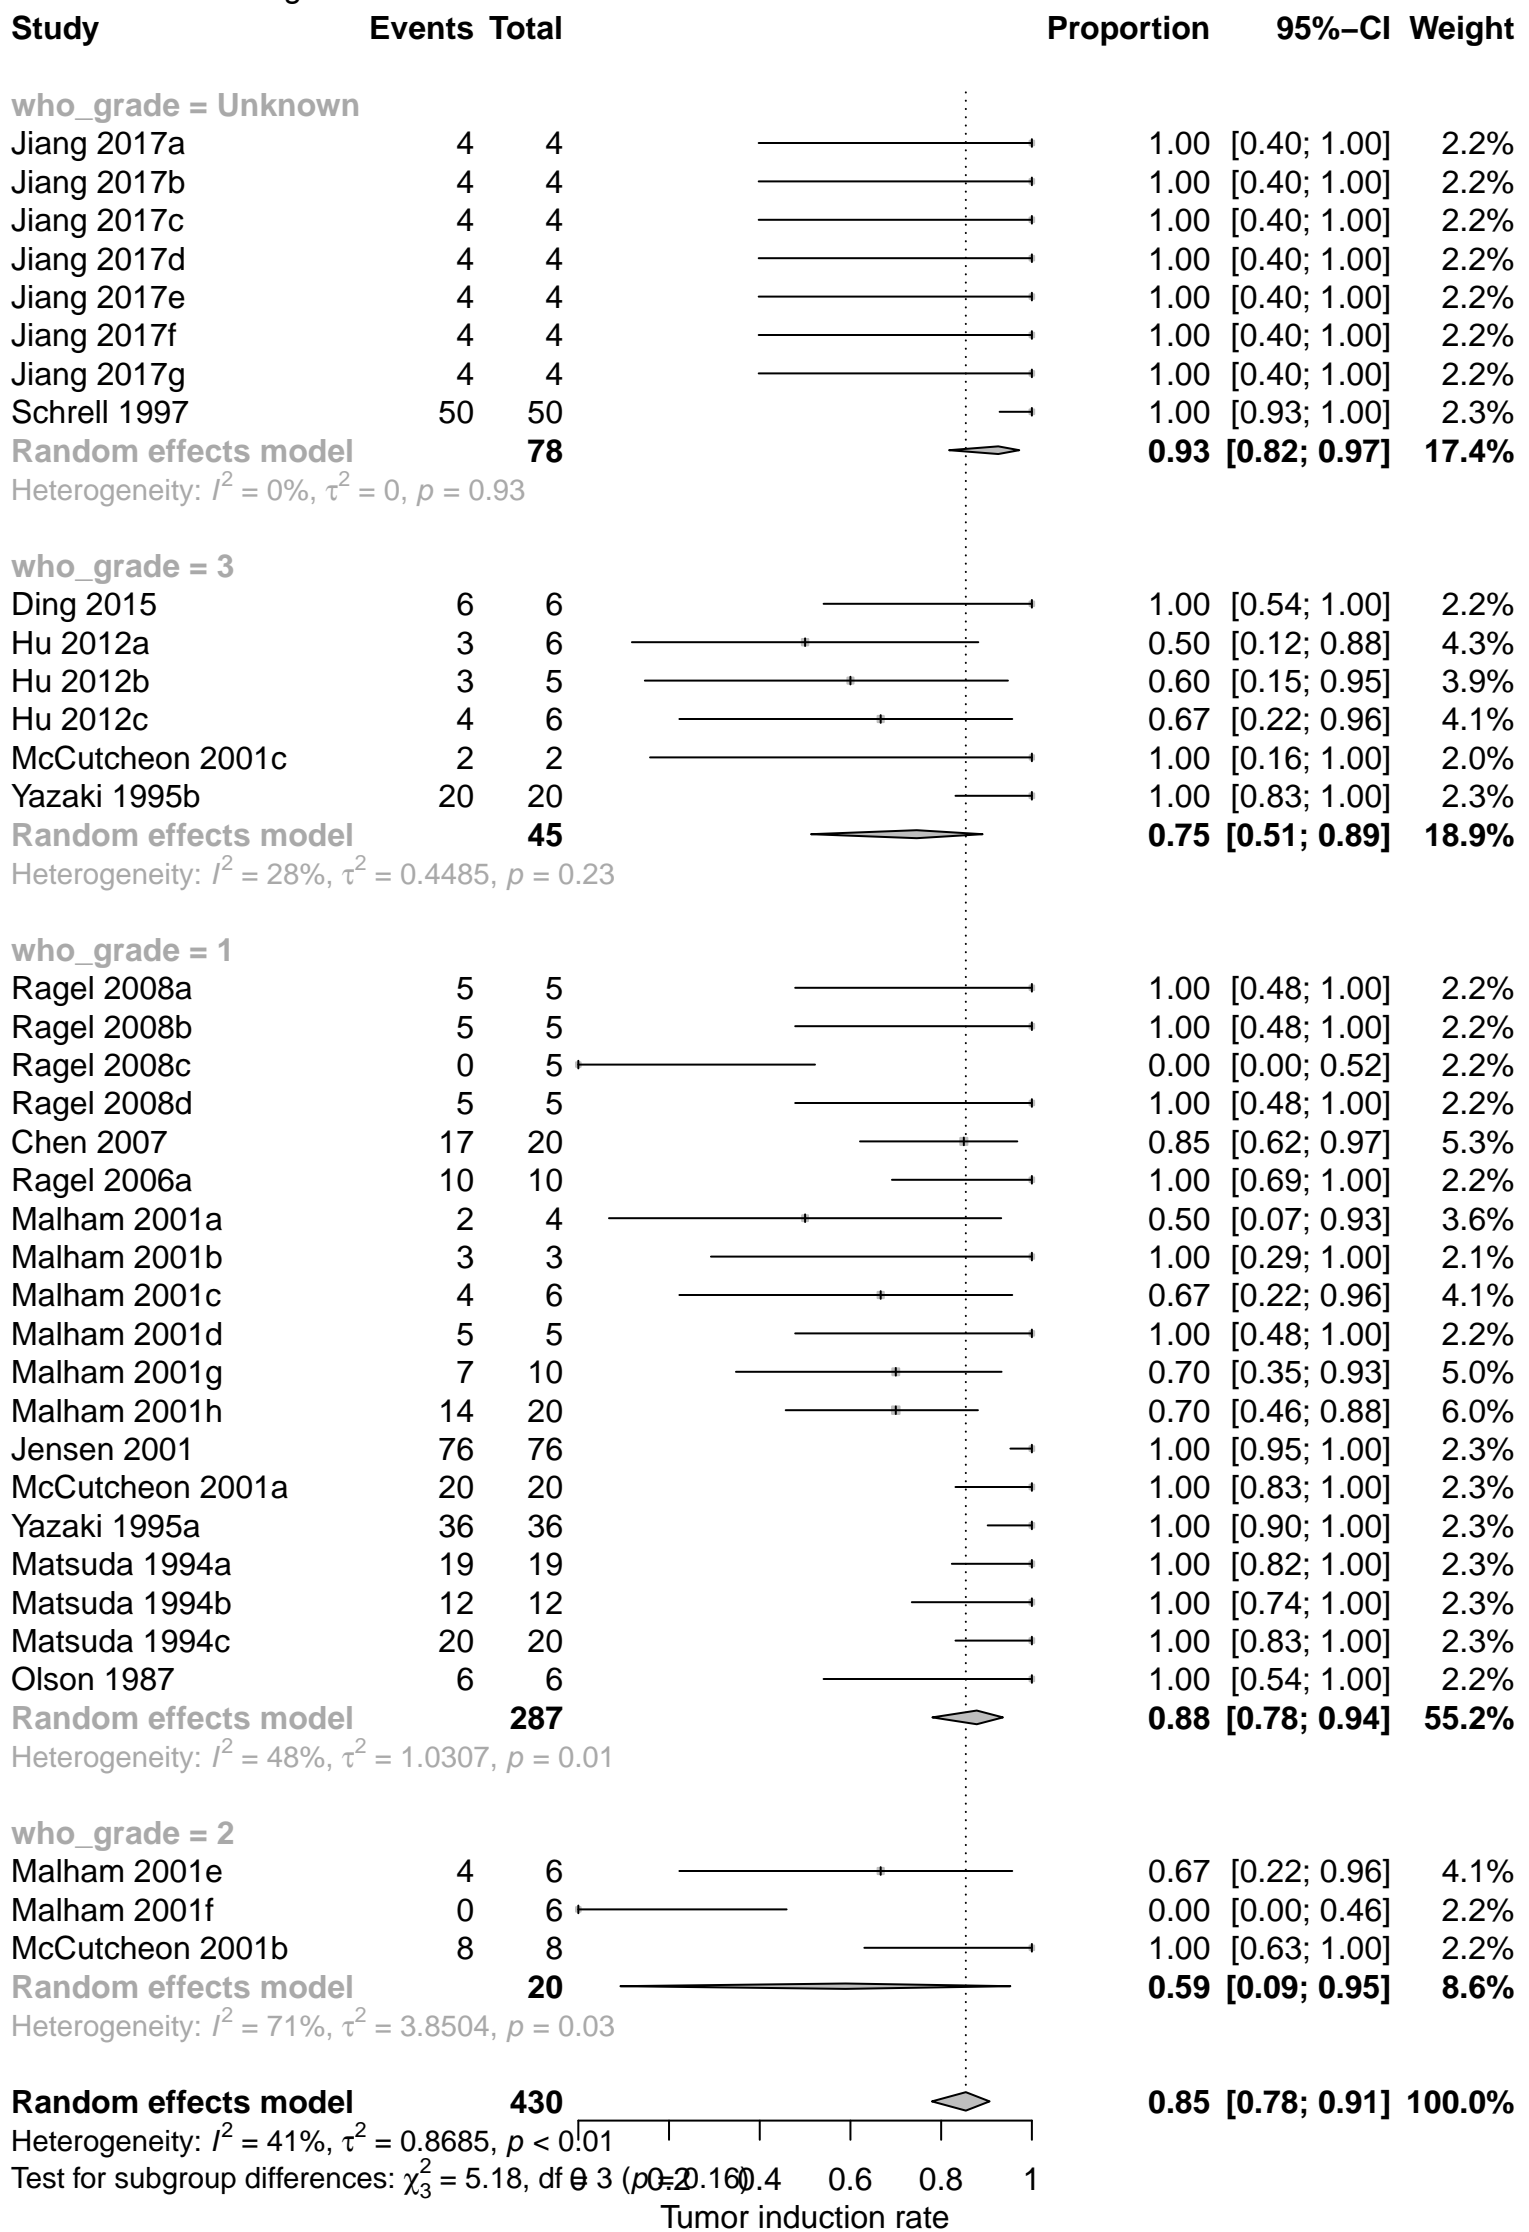

PTM-ortho-WHO-grade

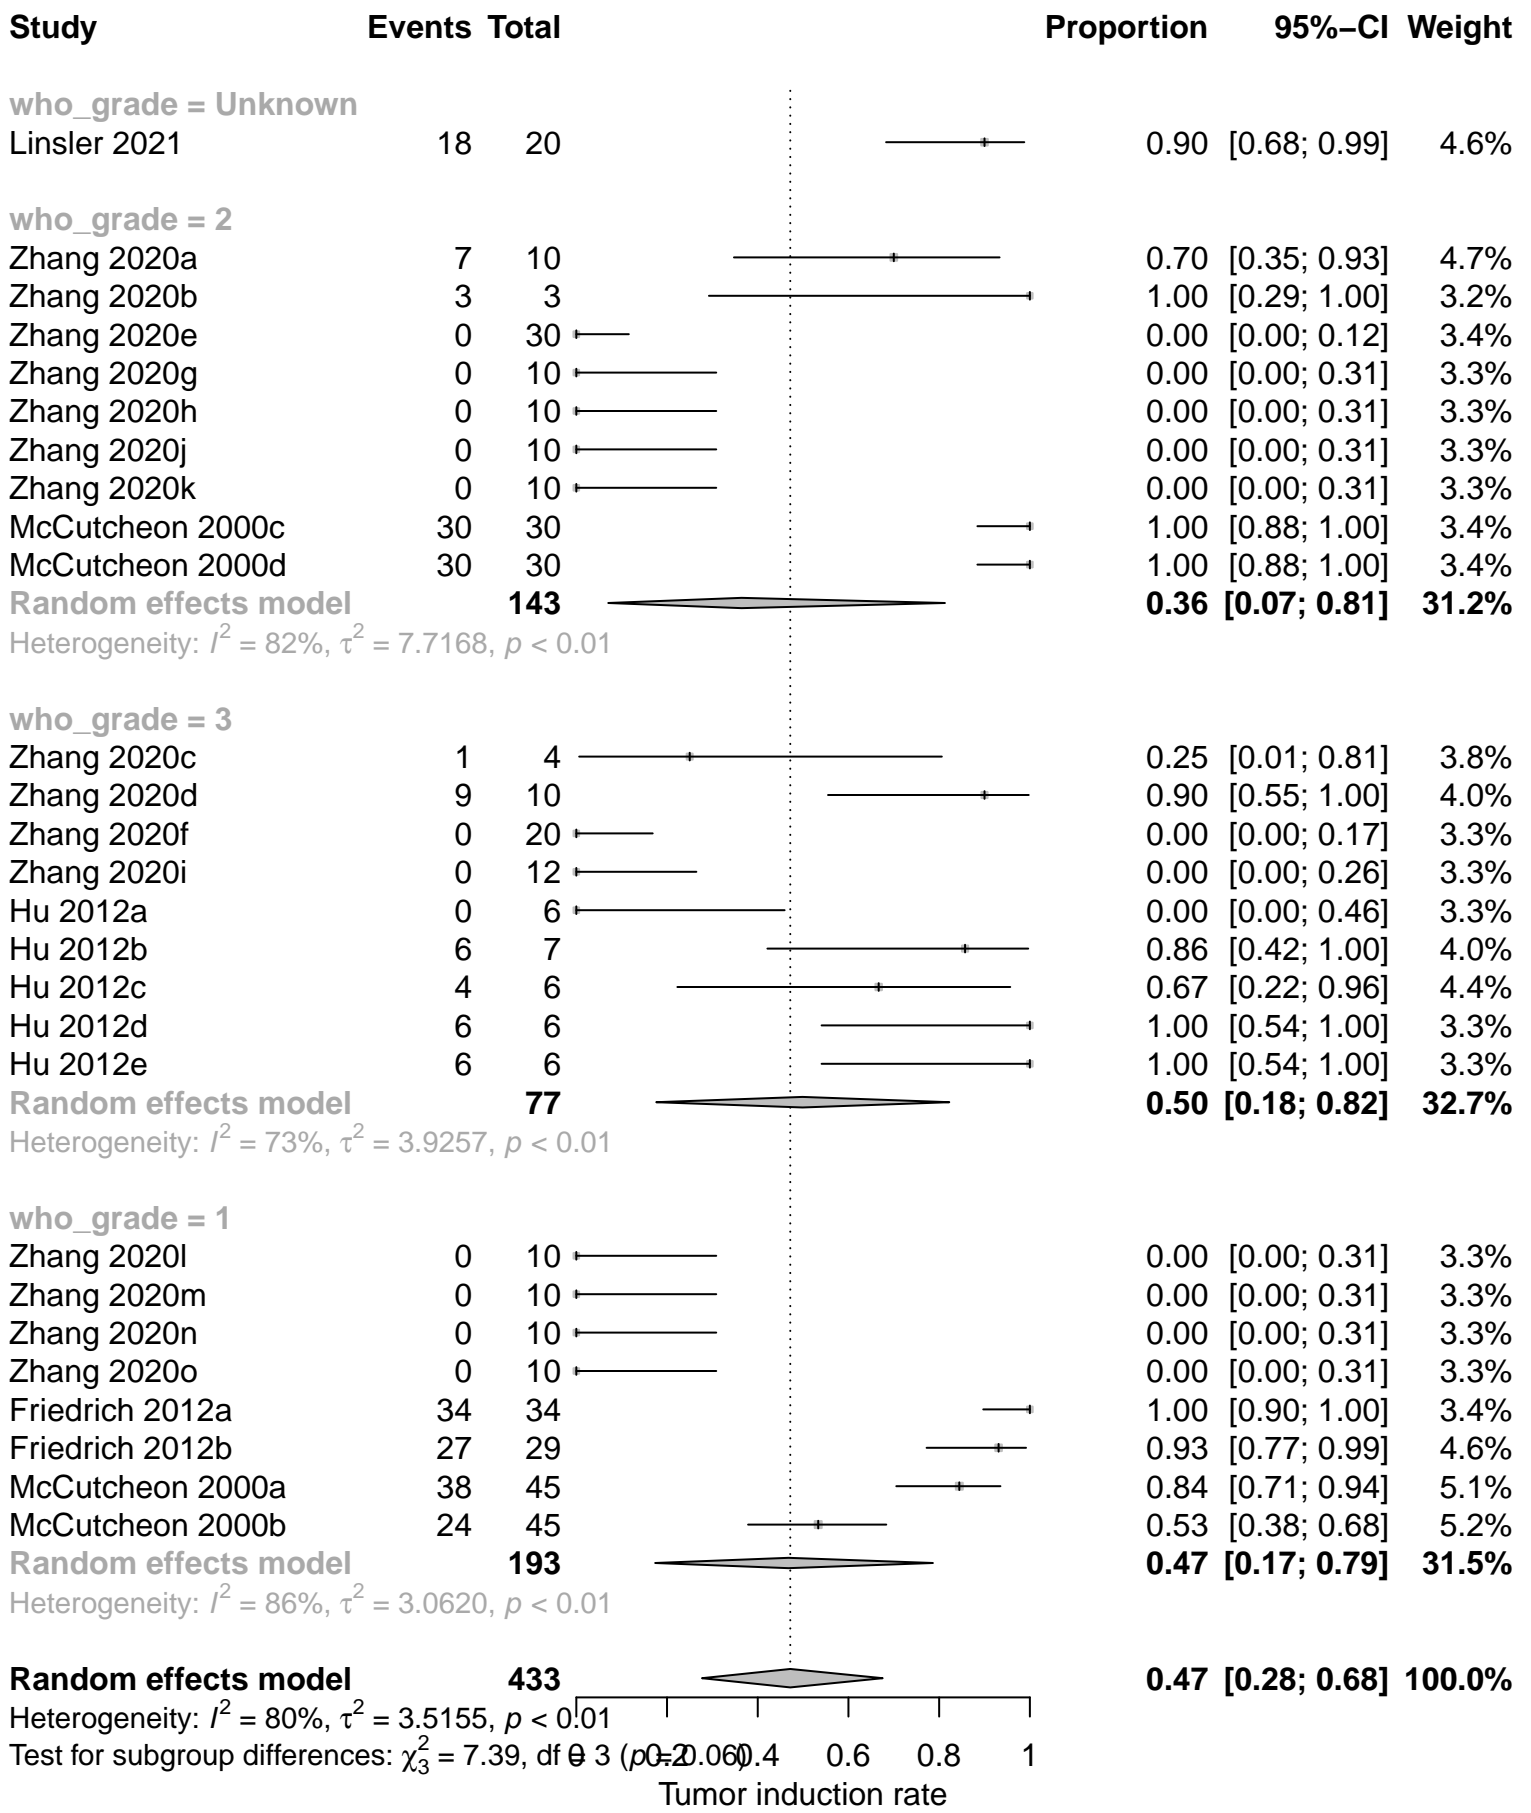

Supplement: 12967_2023_4620_MOESM13_ESM.pdf [file 12967_2023_4620_MOESM13_ESM.pdf]
